# Supplementary material
Source: Research Square preprint supplement (doi:10.21203/rs.3.rs-9669782/v1)
Supplement: Supplementary file 1 [file 0f0c258746bbdf340169a5d4.xlsx]

## Sheet: 2007
Inter-sectoral Embodied Carbon Flow Matrix
	F1	M1	M2	M3	M4	I1	I2	I3	I4	I5	I6	I7	I8	I9	I10	I11	I12	I13	I14	I15	I16	I17	I18	E1	E2	E3	C1	S1	S2	S3	S4	S5	S6	T1	T2	T3	T4	T5	T6	T7	T8	T9	T10	T11	T12	T13	T14	T15	T16
F1	0.00239744	0.000105587	2.72251e-08	7.44534e-05	1.50822e-05	0.00521764	0.000538151	0.0018387	0.000627168	0.00148868	0.000362336	1.91517e-06	0.000426506	1.07091e-05	8.61945e-07	6.31014e-06	7.1833e-06	2.28123e-06	1.33257e-06	2.21369e-06	3.07765e-07	0.00125447	0	3.50221e-06	0.000146787	3.63398e-08	0.00119646	0.000748696	2.28657e-06	5.5163e-05	9.51189e-05	8.36938e-05	4.01494e-05	1.31131e-07	4.55224e-06	2.84552e-06	1.81783e-06	6.17093e-05	0.000203947	0.00259401	2.54648e-05	0.000154645	2.80186e-05	7.72406e-06	0.000302778	3.25888e-06	0	0	5.3324e-05
M1	0.000246481	0.00188096	0.00042643	0.000328798	0.000196002	0.000247619	4.05466e-05	0.000314554	6.36827e-05	0.000533591	0.000361229	0.00232422	0.000919434	0.00288057	0.00162544	0.000155204	0.000334787	0.000206779	9.6004e-05	2.58291e-05	4.03755e-05	0.000667092	0	0.0121927	0.0178705	0.000153101	6.32635e-05	0.000733511	0.000302228	0.000450994	0.000281963	0.000884838	0.000247346	6.47751e-06	0.000160164	2.81702e-05	0.000367654	0.000544987	8.8758e-05	0.000200229	6.54104e-05	0.000612954	6.17904e-05	5.59596e-05	0.000105616	9.61419e-05	0.000155097	2.81875e-05	0.000452679
M2	1.51052e-06	1.02746e-05	0.000423453	8.86644e-05	0.000170185	8.77418e-06	2.47415e-06	3.48285e-05	0	0	1.47346e-05	0.0242995	0.000664943	8.50149e-05	0.000109369	6.24914e-05	3.75129e-05	2.46065e-05	8.63086e-06	1.25446e-06	2.12814e-06	7.86691e-07	0	0.000345452	0.0018612	1.40301e-06	0	2.38527e-05	1.84965e-07	4.2619e-06	4.36772e-06	0	4.6907e-06	0	0.000175499	3.73933e-05	0	5.01179e-05	0	1.96847e-05	3.28767e-06	5.20599e-05	1.70398e-08	0	8.55517e-05	0	0	0	0
M3	0	0	0	0.0057414	0	0	0	0	0	0	0	0	0.000310291	0.000161422	0.00755772	0.00157174	0.000325259	0.000113709	0.000499587	2.11936e-05	8.31748e-05	1.25161e-05	0	4.40276e-05	0	0	0	0	0	0.000577342	4.75893e-05	0	4.45708e-11	0	0	0	0	0	0	0	0	0.000155962	0	0	0	0	0	0	0
M4	1.27276e-05	2.94773e-05	3.32078e-06	2.88675e-05	0.00198354	3.77677e-05	0	0	0	0	1.45639e-06	0	0.000539754	0.00221308	0.000281296	9.06464e-05	3.01194e-05	8.32595e-06	1.09741e-05	8.64687e-06	1.09316e-05	0.000111723	0	6.35006e-06	0	1.40593e-05	0.0010472	0.000137047	1.29019e-05	7.31153e-06	3.50191e-05	1.79661e-05	6.01776e-06	0	3.40045e-07	2.2353e-07	5.80861e-05	0	0	0	0	2.32192e-05	1.10128e-05	1.86386e-05	5.9917e-08	0	0	0	0
I1	0.00070962	1.19142e-06	5.21445e-06	5.16275e-06	0	0.00169968	4.42586e-07	4.71013e-06	0.000445433	5.37201e-07	2.2894e-06	0	9.34141e-05	2.51273e-07	0	0	0	0	0	0	2.48044e-07	6.01033e-05	0	0	0	0	1.12562e-05	2.18274e-05	1.51549e-07	2.66116e-05	6.37628e-06	0.000125741	3.50253e-05	0.000305114	1.2884e-05	6.92164e-06	1.7601e-07	0.0014224	2.50687e-05	0.0028114	4.52535e-05	8.98897e-05	0.000115069	4.30002e-05	0.00149909	4.23116e-06	3.50416e-07	1.70821e-06	7.11512e-06
I2	1.2913e-07	0	0	0	0	0	0.000190982	0	0	0	0	0	0	0	0	0	0	0	0	0	0	0	0	0	0	0	0	1.1032e-08	0	1.11338e-06	2.11807e-07	0	8.46166e-08	3.80921e-07	6.17525e-07	0	0	1.79414e-05	1.93087e-05	6.25895e-05	1.41122e-07	8.72961e-07	9.18776e-06	5.31767e-08	0.000128839	2.47562e-07	0	0	1.00359e-07
I3	1.17053e-05	1.09041e-05	3.7035e-05	1.38449e-05	1.72768e-05	2.67604e-05	4.68103e-06	0.00631826	0.00532562	0.000207697	0.000310642	1.9455e-06	6.30661e-05	9.24246e-05	6.48284e-06	5.25694e-05	9.47956e-05	3.59834e-05	1.183e-05	2.91323e-05	3.67696e-05	0.00158685	0	2.82984e-06	2.66901e-06	4.17097e-06	4.36183e-05	6.30662e-05	7.03392e-07	0.00015765	8.2944e-06	7.47297e-05	7.91954e-05	9.30905e-06	4.55423e-06	8.70651e-06	6.01832e-05	5.54932e-05	7.2964e-06	3.1224e-05	1.94135e-05	5.6189e-05	0.000174582	9.08977e-06	0.000140724	2.74318e-05	7.60689e-05	4.45636e-06	4.87257e-05
I4	9.62161e-07	1.84361e-05	2.20492e-05	2.80732e-05	2.83308e-05	4.31472e-06	1.65512e-06	1.61566e-05	0.000724888	8.34948e-05	3.7431e-05	5.68137e-06	1.94238e-05	1.70252e-05	8.6167e-06	1.03607e-05	1.20994e-05	1.71031e-05	9.32262e-06	4.00965e-06	1.27716e-05	1.83617e-05	0	1.3529e-05	3.54082e-05	2.12445e-05	9.48218e-06	2.54285e-05	3.32517e-06	3.15707e-06	9.63772e-06	3.95505e-06	1.3019e-05	9.96749e-06	1.71479e-05	6.85512e-06	6.26532e-06	6.74693e-05	5.35208e-05	1.1046e-05	1.87781e-05	1.86317e-05	7.64441e-06	0.000134557	3.14966e-05	5.51686e-06	0.000131921	2.07378e-05	1.18264e-05
I5	7.15965e-05	0.000167436	3.06695e-05	5.56087e-05	5.05691e-05	2.81822e-05	1.12549e-05	2.12314e-05	4.29367e-05	0.00602683	0.000373023	1.01609e-05	5.14264e-05	0.000145677	1.53551e-05	0.000325141	7.75297e-05	6.0668e-05	8.53142e-05	3.26642e-05	5.42944e-05	0.000446479	0	1.99867e-05	2.66779e-05	4.44923e-05	0.000866981	6.53297e-05	6.01749e-05	0.000106228	6.18196e-05	0.000435608	0.000132304	6.99421e-06	1.12344e-05	2.13036e-05	8.73507e-05	5.44747e-05	0.000119886	6.42253e-05	3.35998e-05	0.00016259	0.000295649	0.000578317	5.052e-05	1.62537e-05	8.83585e-05	5.49397e-05	1.5208e-05
I6	3.63454e-05	2.84657e-05	4.28455e-05	6.28028e-05	9.4704e-05	0.000404117	0.000499412	0.000118936	0.000286599	0.000272824	0.00462331	2.14587e-05	0.000261825	0.000597504	2.50429e-05	0.000153993	0.000116161	5.18371e-05	0.000483974	0.000162489	0.00021531	0.000983224	0	4.20089e-05	6.04723e-05	8.29083e-05	1.91217e-05	5.77847e-05	4.14259e-05	0.000211996	0.000213207	0.00103874	0.000108379	4.90448e-05	0.000125838	1.72066e-05	4.33991e-05	9.30318e-05	0.000714842	5.89734e-05	0.00148305	0.000171033	0.00332901	0.000809097	0.000382609	0.00061279	0.00236764	0.00038764	0.0013251
I7	0.000286377	0.000305056	0.000577379	0.00185307	0.000856036	6.10997e-05	1.10609e-05	8.19591e-05	6.89557e-05	0.000234186	0.000146853	0.00115475	0.000908542	0.000792681	0.000957558	0.000239532	0.000193912	0.000107521	0.00015505	6.07367e-05	6.46377e-05	0.000310527	0	0.00114153	0.00288994	6.64067e-05	0.000735897	0.00248379	8.15497e-05	0.000308572	0.000168086	0.000109541	7.21311e-05	0.00315562	0.00287677	0.00571878	0.00131338	0.000356694	0.000374292	6.64099e-05	0.000106989	0.00162381	0.000217923	0.000351935	0.00028908	1.87195e-05	0.000388547	9.71906e-05	0.00029984
I8	0.00416947	0.00133174	0.000856812	0.00289506	0.00531621	0.0020269	0.00108123	0.00611689	0.00367805	0.00500737	0.00628618	0.00102869	0.0218202	0.00388506	0.000892206	0.00187643	0.00300123	0.00352685	0.00700925	0.00328298	0.00674565	0.00444104	0	0.000386449	0.000588464	0.0024121	0.00231131	0.000540068	9.42427e-05	0.00112874	0.000678838	0.000758307	0.0184937	3.47305e-05	0.00100226	0.000259966	0.000167932	0.00127581	0.00116839	0.000284946	0.000293706	0.00165769	0.0017437	0.000834757	0.000521415	0.000322906	0.000418829	0.000274187	0.00018522
I9	0.000340278	0.000815269	0.000382958	0.000757871	0.00104008	0.000654642	2.88448e-05	0.000186108	0.000247762	0.00055801	0.000271432	0.000237368	0.000571986	0.00819539	0.00182573	0.00099196	0.00050038	0.000583444	0.00136019	0.00255404	0.00239447	0.00156323	0	0.000209333	0.000239	0.000307648	0.0116883	0.000384415	0.00124363	0.000503201	0.000976094	0.000584416	0.000274577	2.18382e-05	0.000107067	7.50236e-05	0.000266007	9.52028e-05	0.000127126	0.000322639	5.8683e-05	0.00140526	0.000555188	0.000733102	0.000267496	2.5424e-05	0.00109185	0.000122156	0.000391534
I10	8.9175e-05	0.00305385	0.00135558	0.00160193	0.000527881	0.000146422	2.38083e-05	8.11328e-05	0.00015924	0.00131507	0.00074892	0.000469844	0.000594425	0.00190268	0.0223089	0.0249919	0.0129381	0.00784139	0.0145817	0.00134334	0.0047486	0.00458277	0	0.000189965	0.000202574	0.000150952	0.00904063	0.000914142	0.000215311	0.000525307	0.000473169	0.000105546	1.51568e-05	1.35218e-06	1.27395e-05	9.71297e-05	0.00116382	1.83633e-06	4.28948e-05	1.18182e-05	3.77105e-05	0.000563336	9.78058e-05	1.38337e-06	5.55224e-06	7.69234e-06	0.00014745	0	0.000454611
I11	7.96422e-05	0.000479608	0.000198635	0.000523022	0.000212606	0.000198887	1.95636e-05	4.58118e-05	0.000101555	0.000516408	0.00033797	8.02278e-05	0.000197348	0.000671918	0.000240445	0.00292265	0.000909026	0.000426298	0.00106381	0.000506599	0.000962555	0.0011444	0	0.000118336	0.000159788	0.000764949	0.00138805	9.89091e-05	7.75834e-05	0.000547578	0.000316581	8.4211e-05	5.61089e-05	1.55038e-05	6.56088e-05	2.94868e-05	5.35847e-05	4.18731e-05	7.77097e-05	5.90922e-05	0.000472156	0.00019227	3.92361e-05	8.76003e-05	5.03423e-05	0.000252953	2.50669e-05	5.29309e-05	0.000737596
I12	0.000175305	0.000768958	0.000525071	0.000859069	0.000913458	7.89279e-05	3.89998e-05	0.000333534	8.98764e-05	0.00020945	0.000248245	0.000253576	0.000243767	0.000729327	0.00054389	0.00035963	0.00378261	0.00180099	0.000940716	0.00026262	0.000638087	0.000149282	0	0.000763716	0.000549284	0.000575943	0.000993973	0.000519205	0.000155373	0.000559016	0.000538252	0.000172918	0.000701859	0.000885247	0.00037754	0.000652366	0.000359159	3.25932e-05	0.000337414	4.06393e-05	0.000449499	0.000655788	4.14312e-05	0.000456036	0.000153265	0.000320027	0.000936124	0.000185275	0.000153231
I13	5.8875e-05	0.000102825	0.00010836	0.000232438	0.000261244	3.63516e-05	1.04123e-05	2.55467e-05	1.84015e-05	5.81105e-05	8.81683e-05	3.77456e-05	3.49117e-05	3.18003e-05	8.98049e-05	5.29824e-05	0.000149253	0.00359775	6.38882e-05	3.60883e-05	6.62e-05	4.40755e-05	0	9.76953e-05	0.000224991	0.000168076	4.91394e-05	0.000676907	0.00011046	9.89567e-05	0.000131728	8.69584e-05	1.37103e-05	0.0017663	0.000848077	0.000784897	0.000964102	6.31767e-06	0.00039032	1.16299e-05	0.000370754	0.0011018	0.000170334	2.06795e-05	0.000187357	0.000293059	0.000625233	9.17571e-05	0.000483368
I14	1.09497e-05	0.000238652	0.000174018	9.0937e-05	0.000101501	1.5102e-05	8.6298e-06	3.83346e-05	2.19241e-05	4.30001e-05	5.51617e-05	7.13048e-05	4.58823e-05	7.46786e-05	6.685e-05	6.50943e-05	0.000484015	0.000261499	0.00113447	0.000780189	0.000649588	8.05816e-05	0	0.00034875	4.54985e-05	8.16907e-05	0.000367814	9.32957e-05	0.000101795	0.00067331	5.97363e-05	5.93235e-05	2.49666e-05	2.88866e-06	1.76436e-05	4.85954e-05	4.81353e-05	0.000113988	0.000170091	5.90548e-05	0.000426614	9.68797e-05	4.59214e-05	7.78346e-05	6.39914e-05	0.000827177	6.85896e-05	2.97262e-05	4.51186e-05
I15	2.3897e-06	1.66753e-05	2.27822e-05	1.8181e-05	1.52295e-05	4.57341e-06	1.26756e-06	1.2441e-05	1.25699e-05	9.59192e-06	6.07905e-05	1.56531e-05	1.85078e-05	2.39811e-05	7.78502e-06	1.43914e-05	0.000122053	3.57754e-05	0.000195556	0.00272362	0.00115488	2.78286e-05	0	2.70381e-05	1.63221e-05	2.88838e-05	1.78554e-05	3.79164e-05	4.41053e-06	0.000781131	0.000152453	4.33737e-05	1.26187e-05	3.74191e-05	7.8321e-06	2.14907e-05	9.88248e-06	6.71897e-06	0.000106507	3.932e-06	0.000910698	2.27432e-05	4.2485e-05	1.02908e-05	6.93942e-05	0.00067453	7.22043e-05	6.87638e-05	0.000585945
I16	2.75381e-06	3.70667e-05	7.08313e-05	2.86522e-05	1.76925e-05	4.76119e-06	2.94825e-06	6.63381e-06	1.06557e-05	1.26064e-05	1.44375e-05	1.32154e-05	2.47728e-05	2.05563e-05	1.46462e-05	1.12282e-05	3.08902e-05	3.2039e-05	3.46379e-05	1.71162e-05	0.000422764	1.48202e-05	0	0.000105044	2.43758e-05	3.16291e-05	8.42435e-05	1.78417e-05	2.41297e-06	0.000166231	5.83766e-05	6.2497e-05	3.77681e-05	1.02674e-05	1.59177e-05	2.64556e-06	6.16796e-06	1.65486e-06	8.16971e-06	1.30797e-07	9.09332e-06	4.31552e-05	3.76067e-05	3.62767e-05	4.49249e-06	0.000168372	5.95171e-06	5.13644e-05	2.22981e-05
I17	3.7559e-05	0.000113414	3.5062e-05	0.00012403	0.000161622	4.13238e-05	1.45795e-05	8.41017e-05	9.09878e-05	0.0001006	0.000123433	2.99047e-05	7.29548e-05	0.000105468	0.000105823	0.000109304	0.000122468	6.69e-05	0.000149784	6.00081e-05	0.000105849	0.00165028	0	1.33864e-05	0.000120725	0.000141702	0.000151013	6.03094e-05	5.35956e-06	0.000139855	7.14689e-05	7.18721e-05	6.6628e-05	8.77983e-06	3.43353e-05	3.66267e-05	1.60518e-05	0.000265531	4.21589e-05	2.94787e-05	9.15197e-05	0.000143365	4.50847e-05	1.25617e-05	0.000133611	5.53589e-05	8.49388e-05	2.39645e-05	2.7062e-05
I18	0	0	0	0	0	0	0	0	0	0	0	0	0	0	0	0	0	0	0	0	0	0	0	0	0	0	0	0	0	0	0	0	0	0	0	0	0	0	0	0	0	0	0	0	0	0	0	0	0
E1	0.000392717	0.00218718	0.00152088	0.00347118	0.00159501	0.000371587	5.62411e-05	0.00072372	0.000226337	0.000747229	0.00067587	0.000703089	0.00150428	0.00195562	0.0017075	0.00127215	0.000733062	0.000408198	0.000426219	0.000287566	0.000305505	0.000547393	0	0.00107644	0.00162536	0.00594375	0.000475353	0.00127172	0.000208734	0.00071275	0.000267207	0.00109462	0.000451828	7.58877e-05	0.00031338	4.30581e-05	0.000962238	0.00195774	0.00055324	0.000344402	0.000290476	0.000777544	0.000286658	0.000958666	0.000415208	0.000766792	0.000712179	0.000328423	0.00063011
E2	4.55562e-06	1.11055e-06	0.000136473	0.000180914	7.58431e-05	6.3916e-05	1.61686e-05	3.36227e-05	1.66602e-05	2.79792e-05	2.92025e-05	0.000100081	7.57685e-05	0.000190072	0.000146168	2.36821e-05	4.81263e-05	6.66198e-05	0.000114177	4.01724e-05	6.55512e-05	0.000169273	0	0.000110693	0.00637674	0.000480592	1.70537e-05	9.33339e-05	5.54951e-05	3.87418e-05	4.88934e-05	0.000137569	6.39746e-05	0.000349253	0.000195957	0.000107396	0.000107511	0.000484353	7.25353e-05	0.000363097	9.3821e-05	0.000219069	0.000105889	1.48386e-05	0.000397296	7.39973e-05	0.000184842	2.296e-05	0.000145286
E3	3.11452e-05	0.000114	0.000112131	0.000242091	0.000214604	8.72246e-05	2.80957e-05	9.80239e-05	5.50623e-05	0.000130897	0.00019211	0.000155461	0.000173952	0.000167751	0.000142535	0.000126722	9.17162e-05	0.000113988	9.87623e-05	6.87334e-05	0.000143574	9.40532e-05	0	0.000225593	0.000446053	0.00395402	0.000112845	0.000112124	6.11127e-05	0.000191143	0.000221053	0.000565983	0.000193549	2.13176e-05	0.000199272	9.3182e-05	0.000118372	0.000882532	0.000159399	0.00021832	0.000117078	0.000258086	0.00010222	0.00105315	0.000401092	0.000236947	0.000357991	0.000119357	0.000206338
C1	3.24419e-05	3.72642e-05	1.74975e-05	1.55819e-05	1.06966e-05	5.12939e-06	1.98309e-06	6.84249e-06	8.2522e-06	5.77248e-06	7.05677e-06	5.81892e-06	9.67289e-06	1.46884e-05	1.05148e-05	5.30888e-06	9.12101e-06	1.50457e-05	7.70668e-06	3.77734e-06	7.97273e-06	5.13335e-05	0	1.5358e-05	9.76442e-06	2.60605e-05	2.2366e-05	0.000592073	0.000733728	4.80616e-05	0.000469944	0.00092413	0.000334443	2.44828e-05	9.42293e-05	4.27259e-05	0.00084641	0.000985491	0.000122651	9.32143e-05	8.52615e-05	0.000630173	7.43643e-05	0.00170943	0.00032368	0.000174917	0.0010361	0.000276324	3.8501e-05
S1	8.00164e-05	0.000137433	2.72702e-05	6.47372e-05	0.000124844	4.58344e-05	1.23672e-05	3.16761e-05	2.91859e-05	5.53341e-05	5.71824e-05	0.000126626	6.8021e-05	0.000150286	0.000115478	6.53051e-05	5.18178e-05	4.48909e-05	5.06525e-05	3.9018e-05	4.72377e-05	3.93583e-05	0	0.000178751	0.000271843	1.54272e-05	0.000165849	0.000618441	8.69312e-06	2.1255e-05	2.60615e-05	1.89939e-05	2.34093e-05	0.0002491	0.000116857	0.000162359	4.08566e-05	5.8435e-05	7.01992e-05	4.69185e-05	5.89205e-05	3.274e-05	0.000191871	1.10256e-05	7.55433e-05	2.9981e-05	0.000538357	7.04522e-06	7.8427e-05
S2	3.52086e-06	8.13787e-06	2.719e-06	3.87306e-06	8.73791e-06	1.25789e-05	3.0459e-07	1.48594e-05	3.9648e-05	3.55708e-05	2.74266e-05	4.42314e-06	1.74207e-05	9.02275e-06	3.03427e-06	2.21127e-05	1.46123e-05	1.04844e-05	2.31988e-05	2.21983e-05	9.97506e-05	2.91969e-05	0	2.43478e-06	1.1804e-05	1.89376e-06	1.80821e-06	3.43717e-05	0.000105483	1.40396e-05	2.50498e-05	5.55639e-05	3.10821e-05	8.44342e-06	2.83402e-05	5.45537e-06	2.42098e-06	5.20881e-06	0.000209072	9.80134e-05	0.000110442	4.9836e-05	6.05752e-05	9.53204e-07	0.000287546	0.000104927	8.38117e-05	0.000464349	0.000160476
S3	6.09812e-06	8.24609e-06	3.65341e-05	1.37097e-05	1.45911e-05	4.75106e-06	4.14798e-06	2.19836e-06	4.22184e-06	3.23378e-06	4.20956e-06	1.53554e-05	1.13837e-05	1.13709e-05	3.71418e-06	2.33515e-05	1.44146e-05	1.76571e-05	1.99431e-05	1.98684e-05	1.78766e-05	8.37737e-06	0	4.83947e-06	4.40894e-06	3.77499e-06	1.9406e-06	2.60654e-06	1.07987e-06	0.000374089	6.43792e-05	8.32066e-05	9.71286e-06	4.47951e-07	4.94384e-07	1.30396e-06	1.39899e-08	6.43153e-08	7.00992e-06	1.9569e-07	7.87876e-06	9.78424e-06	5.72009e-07	5.98204e-07	1.66737e-05	7.29245e-05	5.29995e-05	3.31665e-06	1.49225e-05
S4	4.9348e-05	8.43074e-05	7.44113e-05	9.13644e-05	3.64873e-05	1.60983e-05	2.03214e-06	1.10343e-05	1.43818e-05	9.01453e-06	1.73439e-05	1.41633e-05	1.52707e-05	1.71534e-05	1.60556e-05	2.64992e-05	1.93007e-05	1.21381e-05	1.39481e-05	1.13876e-05	1.66432e-05	1.19479e-05	0	3.45516e-05	1.12166e-05	1.0626e-05	4.97839e-05	5.46712e-06	1.50132e-05	5.85393e-05	0.000314423	2.16331e-05	8.79336e-06	6.40961e-06	8.51281e-06	2.55385e-06	8.56823e-06	8.6099e-06	3.45451e-05	0	1.81009e-06	4.37459e-05	4.29192e-06	1.42875e-06	5.3466e-06	7.9943e-06	1.26377e-06	8.6865e-06	9.89936e-06
S5	2.81032e-05	0.000116873	3.83155e-05	8.63425e-05	6.89345e-05	1.86685e-05	1.73173e-05	2.93934e-05	2.55161e-05	2.32565e-05	4.11281e-05	2.07302e-05	3.1437e-05	4.38491e-05	1.92893e-05	5.62539e-05	4.12236e-05	3.5553e-05	2.47308e-05	1.33696e-05	4.05441e-05	2.5019e-05	0	3.2707e-05	5.45281e-05	0.00010303	3.33642e-05	0.000131251	3.05066e-05	0.000125141	6.74883e-05	0.000106019	9.80595e-05	4.41741e-05	0.000110737	3.33486e-05	1.70924e-06	0.000231499	7.66816e-05	2.95897e-05	7.54529e-05	0.000158906	9.99815e-05	0.000107692	6.19163e-05	3.66678e-05	0.000334238	0.000188768	3.46853e-05
S6	5.50949e-06	4.16776e-05	3.868e-06	5.8735e-05	8.42877e-06	2.15104e-05	1.02744e-06	8.70249e-06	3.58392e-05	1.0185e-05	1.20255e-05	7.01208e-06	8.76481e-06	1.01366e-05	1.60222e-05	1.0882e-05	1.60339e-05	1.78912e-05	2.24805e-06	5.36101e-06	7.25676e-06	2.71101e-06	0	1.74047e-05	2.76484e-05	3.0327e-06	5.25636e-06	2.97691e-05	8.24041e-07	0.000130403	4.67217e-05	4.60687e-05	3.35759e-05	1.61592e-05	2.89176e-05	6.92933e-06	5.18378e-07	1.73071e-06	1.95076e-06	3.91611e-06	2.35438e-06	2.72507e-05	5.43359e-05	0.000234241	4.87918e-06	2.36211e-06	1.04794e-06	3.9991e-05	1.66831e-06
T1	7.75057e-06	7.21305e-05	7.02927e-05	8.16735e-05	9.09708e-05	6.00709e-05	1.57317e-05	4.76284e-05	8.62577e-05	7.45168e-05	6.61814e-05	2.143e-05	8.68726e-05	8.26459e-05	2.33079e-05	6.71952e-05	0.000157116	5.77888e-05	9.14295e-05	6.04114e-05	0.000110118	5.39378e-05	0	4.92668e-06	5.62973e-05	6.63558e-05	9.48511e-06	9.60308e-05	0.00016764	0.000492893	0.000436657	0.00050445	8.63673e-05	0.000677177	3.18929e-05	5.73539e-05	0	1.60297e-05	0.00036725	5.65655e-05	0.000861595	0.000345713	0.00026062	0.000836144	0.000122629	6.79027e-05	6.20085e-05	0.000561499	0.000215302
T2	0.000460916	0.000962733	0.000285759	0.000674465	0.00214389	0.00067402	9.49976e-05	0.000416594	0.000531787	0.00094254	0.000646458	0.000368033	0.000634401	0.000851629	0.000596825	0.000712405	0.000657231	0.000414036	0.000573185	0.000335123	0.000556902	0.000574751	0	0.000356787	0.000564939	0.000189829	0.000748907	0.000622875	0.000149411	0.000298266	0.000374816	0.000224553	0.000126135	0.00432216	0.00287549	0.00622102	4.28979e-05	0.000520432	0.000285592	0.000241815	0.000354729	0.000225506	0.000165095	0.000341528	0.00048535	0.000119202	0.000776868	0.000400216	0.000751422
T3	0.000454019	0.000687071	0.000344557	0.00125231	0.000965267	0.000813137	0.000137848	0.000514625	0.000586743	0.00160212	0.00116233	0.00206297	0.000951232	0.00203015	0.00157489	0.0010941	0.000868742	0.000711495	0.000838233	0.000472486	0.000717223	0.00080119	0	0.00131806	0.00203161	0.000340669	0.00139597	0.000944589	0.000159842	0.000307768	0.000226408	0.000293447	0.000160016	0.000224134	0.00043502	0.0048557	0.000199849	0.000248189	0.000788231	0.000419261	0.000365544	0.000448799	0.000421037	0.000229962	0.000225586	0.000203886	0.000311641	9.93703e-05	0.000270765
T4	5.77566e-05	0.000128688	0.000108046	0.000152487	0.000165478	0.000115329	2.76763e-05	8.26974e-05	0.000160016	0.00013274	0.000123028	3.05697e-05	8.51695e-05	0.000157649	4.21924e-05	0.000125006	0.00010479	9.43875e-05	0.000169741	0.000113806	0.000203557	0.000151048	0	9.24336e-05	0.000100809	0.000120672	0.000126004	4.52599e-05	0.000221586	0.00230222	0.00160273	0.00177549	8.41368e-05	2.3346e-06	0.000540903	7.28195e-05	0.00485642	1.41206e-05	0.000622469	5.4694e-05	0.00265434	0.000330706	0.000795673	0.00312532	0.000251583	0.000161112	0.000305758	0.00107688	0.00137558
T5	3.78752e-05	9.05147e-05	6.0389e-05	7.52945e-05	9.41972e-05	5.01168e-05	1.76372e-05	6.11467e-05	3.56291e-05	0.000113388	9.15922e-05	2.81345e-05	5.89105e-05	9.22698e-05	2.53052e-05	7.41587e-05	7.16811e-05	6.29733e-05	0.000134628	3.76876e-05	0.00012177	9.73376e-05	0	4.289e-05	7.378e-05	5.98712e-05	4.46178e-05	0.000207146	0.000168014	0.00051028	0.00104654	0.000563656	9.10996e-05	0.00050317	0.00028612	3.85141e-05	0.000258687	0.00139934	0.000265864	4.65679e-05	0.000722732	0.000275976	0.000520715	0.00204142	0.0001886	0.000168718	0.000305923	0.000775332	0.000410302
T6	0.000434066	0.000413313	0.000203695	0.000413581	0.000462362	0.000828405	0.000425913	0.00065792	0.000865809	0.000797858	0.000860342	0.000467084	0.000593171	0.000736428	0.000622099	0.000530924	0.000561631	0.000593008	0.000650455	0.000626705	0.000581533	0.000932555	0	0.000606887	0.000941211	0.000350612	0.000732309	0.000405432	8.75758e-05	0.0004226	0.00029929	0.000339741	0.000537197	0.000347872	0.000258768	0.000291817	0.000217307	0.000610743	0.000331093	0.000946825	0.000573744	0.000383062	0.000595173	0.000328742	0.000758558	0.000524034	0.000719145	0.000124464	0.000542821
T7	1.60786e-05	0.000106468	3.63626e-05	9.96428e-05	0.000157878	4.06474e-05	1.77051e-05	9.38135e-05	6.58234e-05	5.24736e-05	0.000113684	1.64338e-05	5.50557e-05	0.000105716	2.56149e-05	9.98044e-05	0.000120497	2.94274e-05	0.000116363	2.82517e-05	6.96167e-05	6.53675e-05	0	2.178e-05	0.000268564	6.27694e-05	7.36184e-05	5.66044e-05	0.000160893	0.000189398	0.000261306	0.000153293	8.5833e-05	0.00019532	0.00013329	2.42946e-05	4.64608e-05	0.000118043	0.000322619	2.97702e-05	0.000319985	0.000151857	0.000127653	0.000323652	0.000227031	5.01414e-05	3.39787e-05	0.00022925	0.000183326
T8	1.80629e-05	5.24497e-05	7.46428e-05	4.18526e-05	7.38985e-05	0.000151428	6.18382e-05	5.10081e-05	0.000210887	9.79592e-05	7.06417e-05	4.21335e-05	9.56295e-05	8.40225e-05	2.25753e-05	7.6372e-05	7.83691e-05	0.000114589	0.00013622	0.000129994	7.92804e-05	8.7688e-05	0	1.70387e-05	4.60579e-05	4.27552e-05	0.00010302	7.21606e-05	0.000305058	0.000117281	0.00011099	6.59754e-05	3.00987e-05	0.000447193	4.79586e-05	2.59538e-05	3.06664e-05	0.000149678	0.000243606	0.000143685	0.000251147	0.00011767	0.000155248	6.74593e-05	0.0001343	6.54821e-05	5.64705e-05	0.000176159	0.000109839
T9	0.000100288	9.43302e-05	7.62562e-05	6.30574e-05	3.93453e-05	7.4678e-06	1.06539e-08	7.14783e-06	5.89668e-06	2.18338e-06	1.83636e-06	2.2268e-06	1.86771e-05	6.13607e-06	4.74646e-06	2.90551e-06	8.70026e-07	9.66857e-07	1.92145e-06	2.16586e-06	5.01138e-06	2.10797e-06	0	3.07674e-05	5.72522e-07	0.000268009	0.000304282	8.33968e-05	3.73048e-05	5.9185e-05	0.000147534	9.1456e-05	2.93587e-05	2.53432e-05	0.000175637	9.20916e-06	0.000159168	2.0543e-05	0.000101133	7.29339e-08	0.000207521	0.00177062	1.78496e-05	2.70733e-05	0.000114116	9.15524e-06	4.09548e-07	6.71715e-05	0.000401373
T10	1.06445e-06	1.97863e-06	1.10762e-06	7.67903e-06	6.93439e-06	3.85383e-06	1.90674e-07	4.71865e-06	7.85255e-06	5.67807e-06	3.36015e-06	2.01251e-06	6.77809e-06	1.05462e-05	2.77729e-06	4.57343e-06	8.49303e-06	3.52289e-06	5.77234e-06	5.21772e-06	1.24365e-05	8.84537e-06	0	8.45631e-06	9.25209e-06	1.53979e-05	2.40495e-06	4.8398e-06	1.02282e-05	2.12595e-05	4.39573e-05	7.34999e-05	2.68505e-05	1.43426e-05	1.81418e-06	7.31113e-07	1.01424e-05	5.37361e-06	2.35349e-06	9.91043e-07	8.1819e-05	9.06063e-05	0.000489751	0.000171964	5.59083e-05	5.88823e-05	0.000142231	2.49578e-05	3.89961e-06
T11	0	0	0	0	0	0	0	0	0	0	0	0	0	0	0	0	0	0	0	0	0	0	0	0	0	0	0	0	0	0	0	0	0	0	0	0	0	0	0	0	0	0	0	0	0	0	0	0	0
T12	9.10715e-07	1.45309e-05	1.45527e-05	3.7627e-05	5.26205e-05	1.57471e-05	6.32424e-06	1.14935e-05	2.1097e-05	2.30646e-05	2.19169e-05	7.20425e-06	1.67387e-05	4.33366e-05	7.30284e-06	1.34942e-05	1.58404e-05	9.36506e-06	1.62804e-05	6.99002e-06	2.84501e-05	3.01921e-05	0	8.93313e-06	0.000157072	3.21812e-05	5.4753e-06	1.19644e-06	2.82895e-06	5.84616e-05	1.82866e-05	2.49925e-05	1.56993e-05	2.27751e-06	1.60928e-06	5.5533e-07	0	2.85692e-06	1.52022e-05	1.75205e-05	1.2701e-05	8.10676e-05	4.6878e-05	6.6979e-05	9.25513e-05	1.08787e-05	2.31015e-05	2.94875e-05	1.54561e-05
T13	2.25464e-05	0.000134349	8.52218e-05	4.83354e-05	0.000382588	6.58708e-05	6.87429e-06	7.52281e-05	0.000162935	0.000128131	5.4228e-05	5.51909e-05	9.86978e-05	0.000124819	8.65529e-05	0.00030585	0.000170582	0.000151466	0.000223516	8.94724e-05	0.00014847	0.000177723	0	6.08357e-05	0.000209217	0.000315617	0.000576367	0.000155863	8.04741e-05	0.000160674	0.0002269	0.00020161	0.000109152	0.000107569	9.15789e-05	8.70821e-05	0.000348959	0.000361842	0.000296908	4.6905e-05	0.000194641	0.00017137	0.000744939	0.000236858	0.000100204	0.000279255	0.000408606	0.000622194	0.000260723
T14	9.72495e-06	1.32688e-05	4.74422e-06	7.54169e-06	7.29813e-06	8.69477e-06	1.15351e-06	1.24179e-05	1.9713e-05	1.1813e-05	1.23321e-05	1.85497e-06	1.3362e-05	7.41956e-06	2.73945e-06	9.58883e-06	1.55761e-05	6.95574e-06	1.4145e-05	7.21989e-06	1.22042e-05	1.31536e-05	0	3.54418e-06	8.48016e-06	8.83294e-06	1.93803e-06	1.11748e-06	9.72457e-07	1.73903e-05	1.20328e-05	5.93433e-05	7.14421e-05	2.28153e-06	1.93235e-05	1.01448e-05	0	3.63497e-06	3.60527e-05	6.02779e-06	4.01375e-05	7.66913e-06	0.000274368	1.1014e-05	1.82892e-05	1.33481e-05	9.49815e-05	8.90072e-05	2.93475e-05
T15	0.000112728	9.81283e-05	0.000122374	9.12601e-05	9.77448e-05	5.61824e-05	2.9803e-05	7.4316e-05	5.67871e-05	7.49123e-05	8.64416e-05	5.82738e-05	7.60339e-05	0.000205962	6.25561e-05	5.00573e-05	9.55056e-05	5.37892e-05	6.7674e-05	8.78761e-05	3.78184e-05	7.68861e-05	0	0.000182765	5.34453e-05	0.000138966	5.94189e-05	0.000205036	0.000537252	3.74307e-05	0.000312103	2.33722e-05	1.64364e-05	0.000414256	0.00045095	0.000337272	0.000173377	0.000375444	0.000390117	6.93172e-05	0.000209647	3.89168e-05	4.96044e-05	2.18275e-05	7.04507e-05	5.70526e-05	0.000170355	0.000472784	0.000257813
T16	4.62801e-06	2.4358e-05	4.45892e-06	3.24501e-06	5.64616e-06	1.00907e-06	7.90158e-08	2.30708e-06	1.28778e-06	2.11128e-06	2.17475e-06	1.16889e-06	2.09109e-06	2.92077e-06	8.01919e-07	1.51527e-06	1.81746e-06	1.03962e-06	1.25473e-06	1.18453e-06	1.13192e-06	6.38236e-07	0	2.20825e-06	3.06517e-06	8.33024e-07	2.50699e-05	2.95748e-05	1.07792e-06	9.8657e-06	1.19198e-05	1.30604e-06	6.03678e-06	0.0002091	1.69415e-05	1.56658e-05	3.6778e-05	4.54987e-06	1.40193e-05	6.52728e-06	2.34142e-05	1.43491e-05	1.80405e-05	1.75115e-05	3.28882e-06	1.978e-05	3.56714e-06	4.1043e-05	6.97991e-05
T17	6.69163e-05	0.000191769	0.000173523	0.000148696	0.000148841	7.21003e-05	2.79035e-05	0.000109505	9.6184e-05	6.09188e-05	0.000105935	0.000167137	0.000124368	0.000122644	0.000154884	0.000134731	0.000112829	8.2881e-05	0.000101376	5.21752e-05	0.000110629	6.02611e-05	0	0.000258475	0.000496782	0.000434869	3.14321e-05	0.000104272	2.96904e-05	0.000165056	0.000353687	0.000200705	5.23295e-05	0.000123706	4.5157e-05	5.38395e-05	7.11637e-05	0.000321892	0.000495204	2.05071e-05	0.000219427	0.000223956	0.000140797	0.000131655	0.000173744	0.000191065	0.000107615	5.07921e-05	0.000178976
T18	0	0	0	0	0	0	0	0	0	0	0	0	0	0	0	0	0	0	0	0	0	0	0	0	0	0	0	0	0	0	0	0	0	0	0	0	0	0	0	0	0	0	0	0	0	0	0	0	0
[truncated: 2 more columns]

## Sheet: 2012
Inter-sectoral Embodied Carbon Flow Matrix
	F1	M1	M2	M3	M4	I1	I2	I3	I4	I5	I6	I7	I8	I9	I10	I11	I12	I13	I14	I15	I16	I17	I18	E1	E2	E3	C1	S1	S2	S3	S4	S5	S6	T1	T2	T3	T4	T5	T6	T7	T8	T9	T10	T11	T12	T13	T14	T15	T16
F1	0.000846187	4.37212e-05	1.02097e-07	6.70184e-06	1.59163e-06	0.00247061	0.000589536	0.000863733	0.000263485	0.000722503	0.000223828	1.40581e-07	0.000161803	2.29148e-06	4.10548e-07	1.05715e-06	5.20472e-07	2.55541e-07	7.483e-08	0	1.51379e-07	0.000639435	1.4229e-06	8.38404e-08	7.19175e-07	0	2.48707e-05	0.000396678	2.73857e-07	0.0001882	1.7776e-05	1.69637e-05	3.22022e-05	0	6.44902e-08	2.41129e-07	1.94528e-06	0	1.595e-06	0.000890909	1.0061e-05	0.000285941	5.51181e-06	2.77129e-06	0.000114686	0	0	0	1.93349e-05
M1	4.60307e-05	0.00843776	0.000197931	0.000349673	0.000192308	0.000198115	4.90785e-05	0.00034157	0.000197742	0.00042471	0.000440805	0.00445778	0.00107879	0.00418875	0.0016167	0.00023583	0.000280075	7.07785e-05	4.55487e-05	1.0709e-05	0.000137473	0.000471424	8.84573e-05	0.00880001	0.00529047	8.80258e-05	7.61841e-05	0.000108629	8.906e-06	9.39413e-05	7.4759e-05	0.000205517	0.00034519	4.65393e-05	0.000193335	2.65481e-05	0.000588003	7.86814e-05	2.44536e-05	4.73894e-05	7.77221e-05	0.000250932	6.77939e-05	6.29575e-05	2.88833e-05	0	0.000108555	0	7.67233e-05
M2	8.61392e-07	2.93084e-05	0.000420338	0.000353857	0.000381826	3.36406e-05	2.96651e-05	3.069e-05	2.83645e-05	1.04318e-05	1.53009e-05	0.0176338	0.000721335	0.000204255	9.04881e-05	4.60608e-05	2.90939e-05	2.3185e-05	1.67055e-05	1.03433e-05	2.86276e-06	2.02357e-05	1.65853e-06	0.000356729	0.0156286	5.9348e-05	0	1.83403e-05	0	3.28241e-06	2.76955e-06	0	4.88431e-06	2.14609e-06	0.000166545	2.34904e-05	0	3.58462e-05	0	8.90777e-05	3.08801e-06	3.78346e-05	3.12618e-09	0	5.64526e-05	0	0	0	0
M3	0	0	0	0.00589948	0	0	0	0	0	0	0	0	0.000199683	0.000107059	0.00820598	0.000480224	0.000141201	1.79977e-05	5.16251e-05	1.03951e-06	4.96837e-05	9.8811e-06	8.80769e-05	1.49113e-06	0	0	0	0	0	0.000452208	3.18134e-05	0	0	0	0	0	0	0	0	0	0	4.99231e-05	0	0	0	0	0	0	0
M4	3.39019e-06	1.36958e-05	1.73321e-05	3.50317e-05	0.00225797	1.21539e-05	0	0	0	0	0	3.92336e-06	0.000555621	0.00230769	8.87463e-05	0.000106212	1.94563e-05	6.00908e-06	1.10191e-05	1.84294e-07	2.69251e-06	8.27276e-05	3.07338e-06	7.95145e-06	1.03622e-06	3.31477e-06	0.000448648	0	0	4.18593e-06	8.59503e-07	1.85531e-05	2.17798e-05	0	0	0	6.79818e-05	0	0	0	0	1.46307e-05	2.8562e-05	1.79666e-05	2.66711e-06	0	0	0	0
I1	0.000558446	7.19962e-07	3.15486e-06	4.40539e-06	4.77956e-06	0.00117111	1.3923e-05	3.23163e-05	0.000280877	1.82288e-05	1.23159e-05	2.30762e-05	7.68415e-05	1.0843e-05	9.6096e-06	8.81806e-06	8.56938e-06	8.15525e-06	1.04112e-05	9.51715e-06	8.82041e-06	6.3337e-05	6.5299e-07	5.6638e-06	7.67924e-06	8.26382e-06	1.27433e-05	6.25009e-06	2.16304e-06	7.3342e-05	3.73468e-06	6.2738e-05	5.13432e-05	0.000143631	1.60948e-05	4.96044e-05	3.19466e-05	0.000478618	1.84729e-05	0.00193701	5.11876e-05	3.72966e-05	7.92907e-05	5.20816e-05	0.000915741	2.39206e-06	2.96966e-06	2.23742e-06	6.2598e-06
I2	9.9281e-08	3.68344e-06	2.75835e-06	3.25924e-06	4.02703e-06	3.08798e-06	0.000122722	2.93046e-06	3.02543e-06	3.24601e-06	3.08801e-06	3.61313e-06	2.99514e-06	2.91138e-06	2.99445e-06	2.87125e-06	3.08765e-06	2.96096e-06	3.18538e-06	3.04372e-06	3.03954e-06	3.23452e-06	1.67871e-06	3.89143e-06	3.75782e-06	2.66091e-06	3.30878e-06	3.17038e-06	3.10752e-06	4.51264e-06	3.14084e-06	3.07234e-06	3.16831e-06	3.14562e-06	3.40275e-06	3.49383e-06	3.37694e-06	2.05975e-05	6.86583e-06	2.22235e-05	3.44259e-06	2.8208e-06	3.63206e-06	3.73863e-06	9.81584e-05	3.23336e-06	3.00464e-06	3.28419e-06	2.61101e-06
I3	1.35415e-06	3.00184e-06	7.94896e-06	5.87546e-06	5.66094e-06	5.3297e-06	1.08355e-06	0.00367179	0.00313847	9.97274e-05	0.000176463	6.0029e-07	6.89855e-05	2.07686e-05	9.51268e-07	1.39159e-05	1.16224e-05	1.60693e-05	1.69749e-05	2.20269e-06	1.20349e-05	0.000851708	1.09994e-06	4.61647e-07	9.37784e-07	2.94995e-06	6.76858e-06	1.12672e-05	7.10157e-06	0.000167072	5.71571e-06	2.66862e-05	7.23752e-05	4.68383e-05	3.52267e-06	9.81164e-06	1.32323e-05	0.000247416	1.47069e-05	6.13325e-06	0.000111419	3.1483e-05	3.99527e-05	1.02794e-05	3.42984e-05	9.20372e-07	1.1424e-05	1.10848e-06	1.57837e-05
I4	2.02192e-06	1.9676e-05	1.88479e-05	2.13949e-05	2.14343e-05	5.10601e-06	1.72848e-05	8.15946e-05	0.000759411	9.492e-05	3.65818e-05	2.59415e-06	1.12153e-05	1.25662e-05	1.05996e-05	1.37544e-05	9.89216e-06	4.8013e-05	9.63807e-06	7.91056e-06	1.35754e-05	7.1487e-05	8.76902e-07	1.58314e-05	4.803e-05	2.59463e-05	1.74231e-05	3.54584e-05	1.53337e-05	3.39482e-05	7.7215e-06	9.11001e-06	5.05959e-05	3.78819e-05	2.30832e-05	3.96263e-05	3.14345e-05	5.5597e-05	5.21251e-05	7.97803e-06	5.73032e-05	5.12423e-05	0.000140938	0.000328086	3.30713e-05	8.35468e-06	2.89437e-05	1.07608e-05	1.17873e-05
I5	1.06254e-05	8.98835e-05	4.33257e-05	3.42657e-05	1.98705e-05	1.14976e-05	8.32999e-06	8.64225e-06	1.82426e-05	0.003058	0.000223574	4.10005e-06	1.58145e-05	6.74997e-05	6.86586e-06	0.000157957	3.19784e-05	9.62337e-05	2.44565e-05	1.48459e-05	2.67733e-05	0.000310818	1.39005e-06	6.30968e-06	1.07297e-05	1.65794e-05	0.000184406	5.11391e-06	8.78315e-06	3.1954e-05	1.24838e-05	0.000211619	0.00010971	4.44032e-06	1.43556e-05	1.08449e-05	1.56086e-05	1.61903e-05	4.34088e-05	2.05872e-05	2.4698e-05	9.97555e-05	0.00021991	0.000136045	2.82299e-05	8.78817e-06	4.27179e-05	8.48194e-06	7.59642e-06
I6	9.22545e-06	1.42034e-05	2.44741e-05	2.18515e-05	2.40168e-05	0.00013656	0.00105136	9.78696e-05	0.000146125	0.000158455	0.00300591	7.31073e-06	0.00013855	0.000241274	9.95931e-06	9.54367e-05	4.35695e-05	3.51551e-05	0.000109225	8.68295e-05	0.000116573	0.000217353	2.26519e-06	1.9679e-05	2.33067e-05	2.97173e-05	1.7397e-05	3.07201e-05	4.29329e-05	0.000105896	0.000132742	0.000491071	0.000184955	1.58915e-05	4.89625e-05	7.76618e-06	1.2691e-05	7.82594e-05	0.000185655	3.99493e-05	0.000911827	5.15151e-05	0.00133092	0.000620344	0.000144371	0.000230292	0.000250115	0.000270867	0.000389981
I7	0.000175032	0.00030511	0.000818558	0.00133018	0.000878306	7.00747e-05	4.25465e-05	7.5957e-05	0.000128272	0.000118	0.000112954	0.00125068	0.00137814	0.000660334	0.000999298	0.000210019	0.000217453	9.42381e-05	0.000100544	5.52157e-05	6.7119e-05	0.000156614	3.91251e-05	0.000878821	0.000469474	0.000186194	0.000438465	0.00392139	0.000196635	0.000177553	0.000412378	0.000282637	0.000112249	0.0065304	0.00371251	0.00531043	0.00131908	0.000373126	9.61627e-05	7.65226e-05	0.000600493	0.000634549	0.000221252	0.000419503	4.64198e-05	3.47238e-05	0.000734091	0.000135793	0.00201546
I8	0.00313154	0.000729444	0.00107471	0.00192274	0.00435564	0.00127123	0.000599749	0.00494095	0.00236893	0.00362905	0.00569149	0.000766762	0.0170977	0.00312653	0.000534603	0.00161954	0.00139822	0.00219794	0.00347818	0.00257107	0.00415871	0.00389186	0.000911804	0.00012194	0.000227189	0.0021748	0.00160692	0.000934777	0.000471582	0.00393643	0.000824446	0.000597814	0.0147223	6.16732e-05	0.000648181	0.000292706	0.000389751	0.00111419	0.00046675	0.0001826	0.00135664	0.00216539	0.00224635	0.000625832	0.000378029	0.000159519	0.000112874	0.000116036	0.000231693
I9	8.08452e-05	0.000586785	0.000488912	0.000477669	0.00219958	0.000418967	6.4951e-05	0.000132182	7.20622e-05	0.000516413	0.000157235	0.000233276	0.000393038	0.00946608	0.000776711	0.000589643	0.000311862	0.00037167	0.000917926	0.000910889	0.00188053	0.00114003	0.000119745	0.000111838	0.000108807	0.000169162	0.0121289	1.33937e-05	1.10827e-05	0.0003808	9.60673e-05	0.00043708	0.000420673	1.1735e-05	0.000149724	5.26841e-06	0.000238817	0.000139356	1.94559e-05	8.67221e-05	2.39745e-05	0.000574758	0.000586484	0.000432356	0.0001276	1.17761e-05	0.000152888	8.53055e-06	8.80578e-05
I10	8.9316e-06	0.0018147	0.00190381	0.000539188	0.00027427	4.22614e-05	2.60294e-05	2.50583e-05	5.03122e-05	0.000898609	0.000470643	3.00909e-05	0.000347475	0.000899999	0.0124706	0.0131849	0.00786667	0.00424936	0.0104195	0.00105934	0.00125965	0.00383505	0.000355769	3.38424e-05	7.69818e-05	4.44261e-05	0.00579691	0.000414452	2.32371e-05	0.000166697	0.000243576	4.46224e-05	2.42692e-06	1.00045e-06	6.46987e-06	4.00488e-05	0.000413934	9.14184e-07	2.33486e-05	2.5559e-06	1.6625e-05	0.000200429	3.43466e-05	7.2153e-07	2.54793e-06	3.2992e-07	0	0	0.000251546
I11	4.53607e-05	0.000378556	0.000136862	0.000386311	0.000152111	8.28009e-05	2.7058e-05	3.05871e-05	7.07812e-05	0.000413765	0.000251307	6.7038e-05	0.000136938	0.000463098	0.000171301	0.00207198	0.000698863	0.000270724	0.000757342	0.000423134	0.000645208	0.000827713	1.81917e-05	7.5577e-05	0.0001364	0.000474339	0.000599161	0.000238492	0.000125181	0.00037455	0.000311143	5.80725e-05	4.77669e-05	6.18387e-06	1.87516e-05	1.64512e-05	2.67036e-05	2.65985e-05	8.73047e-06	2.56557e-05	0.000375886	8.42069e-05	9.74517e-05	7.12798e-05	2.95026e-05	2.59305e-05	1.04467e-05	1.09155e-05	0.000544087
I12	7.07214e-05	0.000665305	0.00066494	0.000783833	0.000637766	3.69744e-05	4.73883e-05	0.000136162	7.30796e-05	0.00016503	0.000149215	0.00018176	0.000168779	0.000319469	0.00035122	0.000524775	0.00238298	0.00103012	0.000512256	0.000123656	0.000302129	4.54574e-05	6.20725e-06	0.000108937	7.85692e-05	0.000127137	0.000323999	0.000401481	2.7312e-05	0.000149405	8.45422e-05	3.66501e-05	0.00055486	0.000368257	0.000125812	0.000300772	7.16558e-05	1.66013e-05	3.1904e-05	1.7951e-05	6.58933e-05	0.000177806	3.64441e-05	0.000105449	5.36879e-05	8.17073e-05	9.48421e-05	3.12436e-05	8.12317e-05
I13	1.80233e-05	4.40508e-05	3.69729e-05	5.72289e-05	6.89747e-05	6.26694e-06	8.55154e-06	1.01997e-05	7.74591e-06	2.34874e-05	4.00956e-05	1.43032e-05	1.60052e-05	2.74212e-05	2.95486e-05	4.39943e-05	7.39938e-05	0.00161006	1.30005e-05	1.6458e-05	2.78808e-05	6.53512e-05	1.20488e-06	5.43837e-05	9.55878e-05	6.65486e-05	2.27307e-05	4.95145e-05	1.89297e-05	3.97718e-05	6.72089e-05	5.4869e-05	7.746e-06	0.000684128	0.000393512	0.000337557	0.000228847	5.68503e-05	8.08048e-05	1.27104e-05	0.000177424	0.000143032	2.78273e-05	9.42505e-06	4.43422e-05	3.27e-05	0.000420048	1.49028e-05	0.000176027
I14	1.43973e-06	8.84089e-05	4.85145e-05	7.04288e-05	5.08047e-05	7.02993e-06	8.15482e-06	1.1209e-05	9.03085e-06	1.60722e-05	3.28516e-05	6.93637e-06	1.26406e-05	1.94801e-05	1.61735e-05	3.87439e-05	0.000244795	0.000165306	0.000656679	0.000142368	0.000269619	3.17936e-05	7.05639e-06	0.000240758	9.76954e-06	1.74003e-05	0.000191135	2.00193e-05	3.70857e-05	0.000190633	0.000188019	2.34574e-05	2.13665e-05	1.77192e-06	1.00569e-05	7.7599e-06	1.86326e-05	6.6571e-05	4.35553e-05	3.29717e-05	0.000323164	9.94704e-05	4.2151e-05	2.9377e-05	2.19705e-05	0.000299533	6.98447e-06	7.02696e-06	0.000110117
I15	4.98576e-07	8.23442e-06	6.13461e-06	7.05133e-06	5.68717e-06	1.75205e-06	1.66652e-06	3.75641e-06	5.23412e-06	1.8291e-06	3.68154e-05	7.327e-07	2.57486e-06	2.66191e-06	1.08629e-06	4.69026e-06	8.42854e-05	4.07639e-05	0.000220207	0.00188067	0.000920466	1.00745e-05	2.85481e-07	2.58327e-06	1.9787e-06	3.8275e-06	1.03717e-05	1.65474e-05	9.83678e-06	0.000169423	0.000165149	2.46141e-05	5.16187e-06	2.16286e-05	7.78595e-06	5.06875e-06	7.57449e-06	5.43074e-06	2.17677e-05	1.82054e-06	0.00027944	6.26161e-05	3.46724e-05	2.87054e-05	3.19268e-05	0.000226535	2.92765e-05	2.84305e-06	0.000270308
I16	1.43126e-06	2.95016e-05	6.01383e-05	1.79205e-05	1.17378e-05	3.13687e-06	3.79497e-06	3.25639e-06	2.17884e-06	3.35695e-06	9.94051e-06	8.18874e-06	1.75409e-05	9.30201e-06	1.09527e-05	6.74374e-06	2.25336e-05	4.3086e-05	2.2398e-05	2.13843e-05	0.000439628	9.70433e-06	3.71239e-07	8.03643e-05	2.48756e-05	2.65158e-05	1.41951e-05	1.98141e-05	1.13587e-05	0.000189854	0.000174347	0.000102368	1.50326e-05	4.75617e-06	1.9455e-06	1.45127e-06	2.84256e-06	5.91284e-07	1.99212e-06	1.40986e-07	1.95936e-05	4.21466e-05	3.3258e-05	2.32688e-05	2.51175e-06	6.63444e-05	4.58581e-06	1.70702e-05	6.6756e-05
I17	1.13351e-05	4.29624e-05	1.51251e-05	4.77012e-05	6.47184e-05	1.66716e-05	1.19052e-05	3.01736e-05	3.83747e-05	3.83351e-05	4.73637e-05	5.82667e-06	2.63013e-05	4.33508e-05	2.78632e-05	3.62719e-05	7.32798e-05	2.97933e-05	5.15469e-05	3.10988e-05	0.000109203	0.000603567	9.0058e-07	6.65109e-06	6.59502e-06	1.11887e-05	3.23601e-05	3.4032e-06	9.04819e-06	4.12837e-05	2.1078e-05	2.83874e-05	1.77711e-05	6.81145e-06	1.06734e-05	1.20646e-05	1.57526e-05	4.94362e-06	1.0237e-05	9.54557e-06	5.72064e-05	3.91043e-05	1.88703e-05	4.93962e-06	4.62293e-05	9.15951e-06	2.08992e-05	7.86061e-06	1.17857e-05
I18	1.42156e-07	2.56349e-07	4.14371e-08	1.81328e-06	2.13488e-05	2.14207e-06	3.32896e-08	2.944e-06	1.11072e-06	7.0363e-06	0.000130855	6.13828e-07	1.0006e-05	3.68454e-05	0.000105593	2.10288e-05	2.96385e-05	1.56971e-06	2.16313e-05	2.28046e-06	2.0954e-07	7.65289e-06	0.000312076	2.57166e-07	0	0	0	0	0	0	0	0	0	0	0	0	0	0	0	0	0	0	0	0	0	0	0	0	0
E1	0.000935536	0.00623308	0.0069875	0.0134549	0.00650327	0.00116511	0.000271435	0.00224658	0.000594869	0.00223676	0.00224354	0.00228644	0.0047148	0.00628348	0.00467869	0.00459449	0.00228941	0.00110346	0.00104642	0.00100545	0.000812969	0.00177329	0.000495492	0.0358004	0.00166346	0.0195745	0.00131631	0.0009949	0.000406791	0.00178295	0.000632211	0.00293968	0.00156314	0.000263998	0.000917121	0.000117364	0.00422053	0.00946929	0.00151712	0.000913408	0.000855871	0.00208391	0.000909644	0.00311944	0.00118879	0.00218485	0.00140709	0.000858702	0.00061222
E2	1.67143e-06	1.97585e-05	5.51323e-05	0.000227905	0.000234854	2.49716e-05	1.45616e-05	2.15643e-05	1.51977e-05	1.91824e-05	1.21607e-05	7.67143e-05	0.000101301	4.85538e-05	5.53586e-05	3.90474e-05	3.37582e-05	2.24448e-05	2.23301e-05	1.83444e-05	2.34831e-05	4.08988e-05	7.86101e-06	4.65198e-05	0.00196168	0.000143728	4.78516e-06	2.27782e-05	3.00412e-06	1.21433e-05	9.62413e-06	4.3632e-05	2.69105e-05	0.000106392	5.96471e-05	2.74568e-05	1.33974e-05	0.000140987	1.11678e-05	0.000120764	3.58003e-05	3.10275e-05	1.05056e-05	4.52881e-06	0.000106693	2.11456e-05	3.20951e-05	1.30443e-06	4.91097e-05
E3	1.00637e-05	6.84879e-05	7.24756e-05	7.98319e-05	8.57059e-05	3.54308e-05	3.04959e-05	6.14844e-05	3.54041e-05	5.41934e-05	0.00017059	3.25709e-05	8.57342e-05	7.80574e-05	5.75107e-05	6.44671e-05	2.68747e-05	3.54303e-05	2.88701e-05	2.76445e-05	5.46204e-05	6.15119e-05	1.58415e-05	0.000103035	3.96706e-05	0.00187745	2.00783e-05	1.83069e-05	1.07424e-05	0.000118224	9.37843e-05	0.000189668	7.63304e-05	1.47105e-05	6.68412e-05	1.43376e-05	6.63576e-05	0.000506918	4.31899e-05	0.000108275	4.84166e-05	0.000111573	1.3259e-05	0.000634271	0.000212548	9.38757e-05	0.000111826	3.73075e-05	0.0001105
C1	2.25451e-06	1.29416e-05	1.09109e-05	3.52321e-06	3.21233e-06	2.40653e-06	3.46205e-06	1.99147e-06	2.52441e-06	2.24406e-06	2.04588e-06	5.43898e-06	3.2488e-06	2.86864e-06	2.83446e-06	1.53172e-06	2.8732e-06	2.5986e-06	2.07234e-06	1.4785e-06	2.22359e-06	1.6246e-06	8.95583e-07	2.96752e-06	5.75555e-06	1.16004e-05	9.27871e-05	3.45225e-05	0.000118601	2.83427e-05	2.46236e-05	7.04874e-05	0.000238742	7.59726e-06	4.15185e-05	1.05046e-06	5.79057e-05	8.67787e-05	3.04574e-05	9.93586e-06	6.22534e-06	0.000175978	0.000121057	0.000228883	2.1433e-05	1.35721e-05	0.00030773	1.24003e-05	5.45882e-05
S1	0.000180508	0.000169625	4.94356e-05	0.000176807	0.000150855	0.000101703	6.73153e-05	0.000133767	0.000132003	0.000115573	0.000114123	0.000550327	0.000133184	0.000167751	0.000117465	7.5196e-05	8.50005e-05	8.4832e-05	7.47575e-05	4.72624e-05	6.27708e-05	9.76435e-05	2.33566e-05	9.89137e-05	0.000603649	6.90967e-05	0.00209136	0.000774186	2.09524e-05	3.97045e-05	3.45516e-05	3.31719e-05	3.93317e-05	0.00196921	0.000532395	0.00151637	0.000265906	0.000248898	0.000606412	0.000219292	0.000118207	3.43225e-05	7.28378e-05	3.63662e-05	7.53544e-05	3.53708e-05	3.14779e-05	2.01308e-05	8.64629e-05
S2	7.08272e-07	4.80458e-06	1.59087e-06	1.94799e-06	4.13662e-06	6.08139e-06	8.73172e-07	8.79031e-06	2.86299e-05	1.47585e-05	1.354e-05	6.49066e-07	6.66459e-06	6.91212e-06	7.65847e-07	1.25344e-05	8.53826e-06	4.13453e-06	8.36292e-06	6.77951e-06	1.35044e-05	2.18431e-05	8.81267e-07	1.39802e-06	3.00589e-06	1.85181e-06	1.87863e-06	2.84058e-05	2.98808e-05	1.33882e-05	3.07992e-05	2.05164e-05	8.31569e-06	1.26164e-05	1.16186e-05	6.68855e-07	3.30308e-06	6.49199e-05	8.06339e-05	4.15662e-05	4.33711e-05	7.25574e-06	3.23749e-05	3.63827e-05	0.000120412	6.74531e-05	4.08355e-05	8.84918e-05	6.68664e-05
S3	1.08125e-05	1.07729e-05	1.38276e-05	2.47838e-06	1.66607e-06	4.98978e-06	1.22219e-05	3.3669e-06	3.11143e-06	3.98779e-06	3.33062e-06	2.35773e-06	1.37417e-05	4.46238e-06	1.00398e-05	4.57938e-06	2.2174e-05	4.5695e-05	2.22159e-05	4.18064e-05	3.02208e-05	6.77731e-06	4.78553e-07	4.51084e-06	1.59874e-06	1.53673e-06	5.13012e-06	2.45549e-06	1.01582e-06	0.000149727	1.39298e-05	2.29772e-05	4.45002e-06	3.05557e-07	8.6862e-07	1.63331e-06	7.80332e-06	1.50942e-07	1.44164e-05	6.33853e-08	3.24099e-06	5.58898e-06	8.91627e-08	0	3.53134e-05	9.25201e-06	3.08526e-06	6.80095e-06	8.09543e-07
S4	2.52715e-05	3.49318e-05	3.99574e-05	4.51044e-05	3.32327e-05	9.66973e-06	1.16507e-05	6.55628e-06	8.9775e-06	5.22656e-06	1.26386e-05	6.57793e-06	1.48519e-05	1.03858e-05	9.0933e-06	1.35263e-05	1.6121e-05	1.78156e-05	1.31014e-05	1.12146e-05	1.59893e-05	6.65398e-06	1.04252e-06	2.36631e-05	6.08281e-06	4.84758e-06	4.01244e-05	1.83701e-06	4.54204e-06	4.46245e-05	0.000193039	1.14606e-05	6.50435e-06	2.92841e-06	4.52735e-06	5.33784e-06	2.82835e-06	3.52061e-06	1.68045e-05	2.9134e-08	2.04679e-06	1.13104e-05	2.30819e-06	7.10177e-07	4.00072e-06	9.37886e-06	4.66361e-07	1.89456e-06	1.0361e-05
S5	1.23063e-05	3.11842e-05	6.83635e-06	1.23867e-05	3.82239e-05	3.74311e-06	1.28399e-05	3.23004e-06	3.33911e-06	4.95317e-06	3.83304e-06	1.67934e-06	4.2885e-06	4.42165e-06	2.29485e-06	3.63703e-06	1.00715e-05	4.94926e-06	4.00492e-06	2.81255e-06	5.49872e-06	5.59333e-06	2.57874e-07	5.12959e-06	6.98491e-06	2.80536e-05	4.17132e-06	1.01752e-05	5.57023e-06	0.000102651	3.01653e-05	0.000242328	4.50408e-05	0.000105119	2.01415e-05	4.41449e-06	3.08538e-05	3.01598e-05	2.70413e-05	6.6079e-06	1.49336e-05	3.78546e-05	4.56263e-05	0.000129102	3.46393e-05	3.14039e-05	2.79438e-05	7.75398e-05	1.487e-05
S6	7.51933e-06	2.83685e-05	3.99219e-06	2.03441e-05	2.21641e-05	6.10386e-06	4.51747e-06	5.12807e-06	7.54173e-06	9.08411e-06	1.18587e-05	3.60033e-06	6.35597e-06	1.76725e-05	8.87685e-06	2.23336e-05	2.72004e-05	1.89035e-05	1.70523e-05	5.28881e-06	1.66097e-05	2.09443e-06	1.77824e-06	1.32287e-05	2.82025e-05	2.40885e-06	3.18176e-06	3.25186e-06	2.05448e-06	2.6989e-05	9.72219e-06	2.65426e-05	2.74048e-05	8.30965e-06	7.77897e-06	4.02989e-06	1.37947e-06	1.77956e-06	1.95493e-06	2.46285e-06	1.47076e-06	2.80786e-05	2.42173e-05	0.000135233	1.20456e-06	2.49727e-06	1.39882e-06	9.14973e-06	1.82876e-06
T1	3.69706e-05	9.78782e-05	0.000125714	7.29935e-05	8.47267e-05	8.90294e-05	6.46228e-05	6.03296e-05	0.000112338	8.04258e-05	6.73647e-05	1.32621e-05	9.52261e-05	7.35572e-05	1.99023e-05	7.86705e-05	0.000136892	7.6397e-05	0.000110154	0.00010636	0.00020832	0.000125726	1.0879e-05	4.77801e-05	4.44018e-05	7.04762e-05	6.45781e-05	0.000163958	8.45617e-05	0.000829834	0.00122205	0.00106958	8.55266e-05	0.00408226	6.7948e-05	6.57835e-05	2.29745e-06	0.000323247	0.00046497	0.000117143	0.000586796	0.000279496	0.000886611	0.00234074	0.000168514	0.000608812	0.00430743	0.000417311	0.00052286
T2	0.000318827	0.00119828	0.000394263	0.000998345	0.00145342	0.000572806	0.000383656	0.000305322	0.000395755	0.000629133	0.00047396	0.000258303	0.000508337	0.000830844	0.000346786	0.00042474	0.000487638	0.000352841	0.000433378	0.00026602	0.000337336	0.000453799	0.000132073	0.000162675	0.000176072	0.000165785	0.00125632	0.00130738	6.08772e-05	0.000336359	0.000492633	0.000324316	8.71822e-05	0.000104171	0.00242405	3.92287e-05	0.000146026	0.000190008	0.00168048	0.000122319	0.000707395	0.000212774	0.000420647	0.000633359	0.000135206	0.000251919	0.0012285	0.000542311	0.000689896
T3	0.000113418	0.000715616	0.000228094	0.000837919	0.00107086	0.000452678	0.000223277	0.000249614	0.000254629	0.000495855	0.00033668	0.000314505	0.000341846	0.000649803	0.000483962	0.000308974	0.000315347	0.000237902	0.000267807	0.000171064	0.000189396	0.000323083	0.000103548	0.000186663	0.000306351	9.15404e-05	0.000170786	8.83578e-05	9.97075e-06	9.46146e-05	4.32887e-05	5.47663e-05	5.72886e-05	9.88543e-05	5.51086e-05	0.00463651	3.68852e-05	4.90109e-05	0.00128151	0.000156836	8.09496e-05	6.84713e-05	7.68644e-05	7.08619e-05	6.38028e-05	2.33482e-05	6.70461e-05	1.25644e-05	5.24314e-05
T4	8.86246e-05	0.000303818	0.000108648	0.00026025	0.000371996	0.000146693	8.64276e-05	7.75101e-05	0.000103363	0.000175724	0.000106647	7.58284e-05	0.000129899	0.000213139	9.4175e-05	0.000109027	0.000127679	7.89699e-05	0.00010291	6.1925e-05	9.73266e-05	0.000123493	3.02719e-05	7.01855e-05	6.49759e-05	4.35439e-05	7.242e-05	5.44831e-05	2.32914e-05	0.00017474	0.000294133	0.000175435	2.12751e-05	2.11515e-05	1.25846e-05	8.63378e-06	0.000338633	9.27623e-05	0.00044804	3.29387e-05	0.000485174	7.21628e-05	0.000176422	0.000340531	3.91718e-05	9.97134e-05	0.000394426	8.25955e-05	0.000208858
T5	1.95938e-05	6.34298e-05	4.9047e-05	3.56001e-05	3.80623e-05	4.77978e-05	2.24732e-05	2.82893e-05	2.28767e-05	4.33782e-05	3.50458e-05	9.43446e-06	3.33365e-05	3.75236e-05	1.05281e-05	3.48044e-05	5.09058e-05	3.12786e-05	4.84888e-05	1.67964e-05	3.48571e-05	5.86177e-05	5.24623e-06	2.30206e-05	2.67443e-05	4.02134e-05	2.6491e-05	0.00014326	0.000120854	0.000321558	0.000547764	0.000359413	4.33877e-05	0.000106229	0.000128022	3.03778e-05	5.98995e-05	0.000514841	0.000160382	2.35301e-05	0.000875601	0.000120828	0.000599222	0.000876523	0.000101826	0.000194032	0.000130843	0.000642592	0.000446298
T6	7.09048e-05	5.58438e-05	4.61696e-05	5.4987e-05	6.56476e-05	0.00011539	0.000109919	7.07588e-05	7.15614e-05	9.62634e-05	0.000102428	6.91283e-05	7.92017e-05	9.99486e-05	7.46925e-05	9.21664e-05	0.000111395	0.000138779	0.000110327	0.0001357	0.000106258	9.6296e-05	1.89994e-05	3.57533e-05	6.79356e-05	3.01833e-05	0.000112202	5.46156e-05	1.37073e-05	8.66019e-05	5.05008e-05	5.6286e-05	0.00019459	8.88161e-05	4.87169e-05	6.19034e-05	3.25434e-05	0.000100789	3.12347e-05	0.000141629	9.89211e-05	5.18184e-05	8.69237e-05	9.59768e-05	0.000172026	0.000129358	0.000284484	1.89405e-05	6.64853e-05
T7	1.17632e-05	5.92201e-05	4.13549e-05	6.09793e-05	7.60098e-05	2.21911e-05	2.93515e-05	1.63671e-05	2.46338e-05	2.13421e-05	2.07296e-05	1.04181e-05	2.36315e-05	3.16616e-05	1.68241e-05	5.39476e-05	2.88617e-05	1.52009e-05	2.62823e-05	1.17343e-05	3.7188e-05	2.71649e-05	3.20264e-06	1.0423e-05	1.60527e-05	3.72283e-05	4.70902e-05	3.78633e-05	4.09417e-05	0.000118567	0.000117985	0.000152764	6.22937e-05	0.000164826	6.54778e-05	1.28917e-05	1.80614e-05	6.86258e-05	0.000108746	1.55378e-05	0.000216063	7.1821e-05	0.000131911	0.000145058	0.000121769	5.10438e-05	1.1525e-05	9.71278e-05	0.000131861
T8	1.46385e-05	4.00261e-05	1.00183e-05	3.03671e-05	2.82973e-05	0.000140284	0.000104534	2.94243e-05	0.000166456	7.39137e-05	6.42534e-05	5.32947e-05	0.000109655	4.75474e-05	1.1863e-05	2.8801e-05	6.63384e-05	9.82224e-05	0.000164464	8.52432e-05	9.14282e-05	6.85978e-05	2.92441e-06	3.30248e-05	2.861e-05	4.32751e-05	2.42677e-05	2.01808e-05	0.000221697	7.70971e-05	0.000129429	0.000275111	9.32049e-05	2.13414e-05	4.16289e-05	1.28532e-05	1.27011e-05	0.000251925	0.000607124	0.000122811	0.000404988	0.000106785	0.000270997	0.000177607	0.000258404	0.000348352	0.00030669	0.000440059	0.000104035
T9	4.32477e-05	2.87647e-05	1.93236e-05	1.50466e-05	5.34663e-05	6.04605e-06	1.15464e-05	2.68256e-05	2.55361e-06	2.8873e-06	3.51479e-05	5.37347e-06	1.28831e-05	5.51669e-06	6.08026e-06	2.57254e-06	4.19052e-06	4.76422e-06	3.62588e-06	2.11367e-06	1.95622e-06	3.77527e-06	1.13796e-06	3.39309e-05	8.30653e-06	0.00107131	1.05475e-06	4.93302e-06	4.85598e-06	1.22589e-05	4.29859e-06	4.54661e-05	7.4764e-06	1.19363e-05	2.6055e-06	2.49687e-06	2.43333e-05	2.71455e-05	6.69667e-06	4.48499e-06	0.000157703	0.000392883	3.59539e-05	5.65716e-05	0	5.38649e-06	0	1.37293e-05	5.45557e-06
T10	1.26258e-06	3.70229e-06	3.08175e-06	2.56472e-06	3.02702e-06	3.55752e-06	2.43804e-06	3.55257e-06	5.95705e-06	3.83156e-06	3.2763e-06	1.05174e-06	4.04305e-06	5.21324e-06	2.1969e-06	2.8011e-06	5.0412e-06	2.90001e-06	3.92252e-06	3.38472e-06	2.74581e-06	2.62996e-06	1.31448e-07	5.63833e-06	6.92558e-06	1.17299e-05	4.02687e-06	4.3863e-06	1.45138e-05	1.97153e-05	2.09563e-05	3.05233e-05	5.70373e-06	9.20654e-06	3.75898e-06	1.92884e-06	6.49235e-06	4.92338e-05	4.50671e-06	2.87117e-06	1.25978e-05	1.4929e-05	0.000306486	3.71991e-05	5.25657e-05	1.8215e-05	3.48182e-05	7.60614e-06	1.53185e-05
T11	0	0	0	0	0	0	0	0	0	0	0	0	0	0	0	0	0	0	0	0	0	0	0	0	0	0	0	0	0	0	0	0	0	0	0	0	0	0	0	0	0	0	0	0.000732948	0	0	0	0	0
T12	9.84672e-08	5.44282e-06	2.98307e-06	1.28612e-05	2.10603e-05	2.64471e-06	4.23597e-06	2.32361e-06	3.12786e-06	2.89227e-06	2.59718e-06	5.73788e-07	2.04849e-06	3.05777e-06	1.02266e-06	2.42675e-06	2.5805e-06	1.84462e-06	1.77079e-06	9.63486e-07	2.90806e-06	3.90481e-06	5.93599e-07	7.20291e-06	2.5761e-06	6.93554e-06	3.93781e-06	6.23968e-06	6.63627e-06	1.19085e-05	5.84945e-06	2.48857e-05	4.40908e-06	6.43559e-06	6.7212e-06	3.76161e-06	4.94927e-06	1.62486e-05	2.61947e-05	3.89906e-06	1.1129e-05	1.50011e-05	3.31441e-05	1.82893e-05	1.22966e-05	5.65158e-06	0	2.52165e-05	5.24539e-06
T13	2.14417e-05	1.6781e-05	1.1295e-05	9.22833e-06	1.35481e-05	1.12501e-05	5.79749e-06	1.03539e-05	2.31071e-05	1.90959e-05	1.2823e-05	2.42116e-05	1.91843e-05	1.11081e-05	5.36508e-05	1.37225e-05	1.64896e-05	1.03237e-05	1.48227e-05	4.7775e-05	1.98981e-05	3.30083e-05	1.25294e-06	3.4488e-05	7.84501e-06	2.28006e-05	9.03756e-05	1.85779e-05	1.71264e-05	3.22976e-05	2.79933e-05	8.46254e-05	8.01532e-05	4.04226e-05	1.84751e-05	0.000146988	7.10584e-05	8.81782e-05	6.63958e-05	7.99566e-06	2.14012e-05	3.9776e-05	7.71889e-05	7.85592e-05	3.91822e-05	0.000204742	0.000104576	0.000153144	3.08963e-05
T14	8.67041e-06	3.97368e-06	2.27392e-06	2.49569e-06	3.90514e-06	3.14152e-06	1.51139e-06	8.48542e-06	2.13796e-05	8.70418e-06	5.97436e-06	4.93323e-07	8.46062e-06	2.99353e-06	3.24378e-06	2.19012e-06	1.07441e-05	1.98231e-06	7.9842e-06	3.82624e-06	1.21943e-05	3.65822e-06	2.47533e-07	1.49949e-06	1.48227e-06	4.35137e-06	2.76648e-06	6.33672e-06	5.77004e-06	1.96312e-05	1.42323e-05	4.49771e-05	6.10192e-06	1.63315e-06	3.69783e-06	1.13164e-06	0	0.000110122	1.06022e-05	1.69391e-06	1.46396e-05	8.73173e-06	4.36876e-05	1.70202e-05	4.33659e-06	1.40497e-05	0.000447692	3.86143e-05	1.11266e-05
T15	3.03295e-05	7.63485e-05	4.20777e-05	4.24831e-05	4.93902e-05	3.63892e-05	1.3297e-05	5.10404e-05	3.41627e-05	4.72573e-05	4.57924e-05	2.5955e-05	4.77423e-05	8.39426e-05	4.59592e-05	2.70179e-05	3.18803e-05	2.37358e-05	3.38924e-05	7.83498e-05	2.32183e-05	3.86085e-05	1.27602e-05	0.000129931	8.95824e-05	0.000192688	3.19495e-05	0.000206402	9.05762e-05	1.64858e-05	0.000103178	0.00012729	2.59572e-05	0.000109064	0.000231637	5.69368e-05	0.000254369	0.000160061	0.000144368	4.36368e-05	0.000142837	0.000135948	5.02831e-05	4.81649e-05	0.000136555	5.05048e-05	3.25141e-05	0.000234256	0.000280607
T16	5.25346e-07	9.76108e-06	6.96738e-06	3.98957e-06	7.15995e-06	1.18355e-06	9.14809e-07	1.69306e-06	1.63959e-06	2.40629e-06	2.76027e-06	1.34787e-06	2.54337e-06	3.88232e-06	1.08479e-06	1.75812e-06	2.48592e-06	1.16041e-06	6.50335e-06	1.02864e-06	1.37524e-06	8.18192e-07	6.45374e-06	3.58959e-06	3.88539e-06	9.63612e-07	2.86371e-05	7.93116e-05	7.62125e-07	1.19609e-05	1.47659e-05	1.60221e-06	9.68483e-06	0.000258846	2.12193e-05	2.07371e-05	1.66065e-05	5.12264e-06	1.62707e-05	6.34532e-06	3.46492e-05	1.14778e-05	3.6938e-05	2.06726e-05	3.41618e-06	7.6869e-06	2.63494e-06	2.96851e-05	9.12584e-05
T17	3.92347e-05	0.000101313	5.11019e-05	2.88309e-05	4.64084e-05	1.34582e-05	3.19348e-05	1.14445e-05	1.90402e-05	1.26024e-05	2.02736e-05	1.35496e-05	2.34478e-05	3.42999e-05	2.67878e-05	1.75705e-05	1.40123e-05	1.31113e-05	8.95138e-06	6.65723e-06	9.27355e-06	7.74682e-06	1.32862e-05	9.4262e-05	3.16967e-05	0.0001068	1.70319e-05	0.000507368	6.43348e-05	3.33843e-05	0.000103528	0.000130115	8.89732e-05	6.58683e-05	0.00021395	3.44869e-05	6.82405e-05	0.000479787	0.000149144	6.45021e-05	0.000173614	0.00023989	0.000162018	0.000187326	0.000134532	7.25967e-05	1.41273e-05	5.69454e-05	0.00028961
T18	3.39513e-06	2.66245e-06	3.4547e-06	2.04543e-06	1.84595e-06	1.25267e-06	3.61719e-06	1.15006e-06	1.30726e-06	1.2675e-06	1.32418e-06	5.93893e-07	1.18414e-06	1.49478e-06	9.35511e-07	1.14721e-06	1.33284e-06	1.12815e-06	9.86056e-07	8.82042e-07	1.21025e-06	1.44447e-06	0	1.46112e-06	7.78977e-07	2.25225e-06	1.31872e-06	2.31982e-06	4.81858e-06	2.41401e-06	3.10136e-06	3.23366e-06	1.98344e-06	1.41075e-06	2.76346e-06	2.57959e-06	3.71747e-06	2.44097e-06	3.47198e-06	2.10779e-06	1.84547e-06	2.96973e-06	2.39785e-06	2.31201e-06	2.69396e-06	3.46845e-06	2.83421e-06	3.96835e-06	2.2924e-06
[truncated: 2 more columns]

## Sheet: 2017
Inter-sectoral Embodied Carbon Flow Matrix
	F1	M1	M2	M3	M4	I1	I2	I3	I4	I5	I6	I7	I8	I9	I10	I11	I12	I13	I14	I15	I16	I17	I18	E1	E2	E3	C1	S1	S2	S3	S4	S5	S6	T1	T2	T3	T4	T5	T6	T7	T8	T9	T10	T11	T12	T13	T14	T15	T16
F1	0.00125218	6.23248e-06	2.99887e-07	3.20038e-06	6.8291e-06	0.00352174	0.000629609	0.00160358	0.000273728	0.00101894	0.000399354	4.22127e-07	0.000331835	3.41379e-06	1.01576e-06	4.3464e-06	1.71885e-06	4.46607e-07	3.5554e-07	0	0	0.000471154	2.24608e-06	9.05637e-07	1.78598e-07	4.04749e-06	7.16673e-05	0.000635075	2.02626e-06	0.000362875	3.32863e-06	4.908e-05	2.78663e-05	9.53644e-07	9.62329e-08	6.4922e-07	7.61532e-06	4.72398e-05	1.77819e-06	0.00126076	6.7007e-05	0.00062354	1.00879e-05	2.03009e-05	7.51365e-05	1.8826e-05	0	9.91859e-08	5.77766e-06
M1	4.53845e-06	0.0119764	0.000193013	0.000449588	0.000767318	0.000163189	8.29257e-05	0.000238668	0.000108879	0.000209192	0.000699008	0.00430283	0.00134333	0.00381069	0.00199733	0.000315789	0.000153879	3.83009e-05	3.26021e-05	0	4.45181e-05	0.00238378	0.000173843	0.0136299	0.00491666	9.06097e-05	1.97704e-05	0	5.40977e-06	4.05693e-05	3.81407e-05	9.9088e-05	0.000120361	4.04431e-05	5.59947e-05	1.89296e-05	0.000391678	2.2573e-05	4.1552e-07	8.35959e-06	5.98512e-09	0.000207689	9.00516e-05	0.00010191	1.03197e-05	0	6.6954e-05	0	4.1077e-05
M2	0	5.64061e-06	0.000165479	1.40429e-05	2.87266e-05	0	0	0	0	0	0	0.0112342	0.00022983	3.136e-05	7.88009e-06	1.29944e-05	9.38243e-06	4.97787e-06	0	0	0	0	0	0.000198165	0.0090911	0	0	0	0	0	0	0	0	0	0	0	0	0	0	0	0	0	0	0	0	0	0	0	0
M3	0	2.01889e-05	1.92199e-08	0.00502879	9.90307e-05	0	0	0	0	0	0	7.75071e-06	0.000155842	0.000189269	0.00569658	0.000236443	1.52876e-05	2.08136e-06	4.24138e-05	0	4.86929e-06	1.63276e-05	4.8489e-05	2.98852e-08	9.14945e-05	0	0	0	0	5.70886e-05	1.79208e-06	0	0	0	0	0	0	0	0	0	0	0	0	0	0	0	0	0	0
M4	1.88936e-07	8.65308e-05	0.00324165	8.80561e-05	0.000401622	1.42004e-05	4.01592e-08	1.27389e-07	8.92925e-07	5.58079e-06	5.34874e-05	1.7934e-08	0.00022707	0.0022111	2.56119e-05	1.08699e-05	8.33165e-06	3.41924e-06	2.7927e-05	1.83478e-11	5.51628e-07	4.21553e-06	1.40173e-06	1.14099e-05	4.97765e-07	3.91494e-07	0.000174397	0	0	6.11523e-07	1.35148e-06	2.08304e-08	3.88336e-08	0	0	0	6.03209e-06	0	0	0	0	6.36471e-07	1.41209e-06	3.78506e-06	4.46642e-08	0	0	0	0
I1	0.000336012	1.52937e-06	6.14629e-07	8.41344e-06	3.82131e-06	0.000762781	1.24274e-05	3.70095e-06	0.000121174	4.76195e-06	7.72875e-06	5.88697e-06	6.63683e-05	5.86067e-06	1.41226e-06	4.43478e-06	4.37504e-06	2.1455e-06	3.48139e-06	2.01846e-06	6.21565e-06	5.20182e-05	2.66692e-06	1.44136e-06	1.5404e-06	2.77829e-05	3.91062e-06	5.63294e-05	6.51449e-06	7.95791e-05	9.32472e-06	6.16996e-05	4.49434e-05	0.000112486	3.03906e-06	4.98499e-05	6.10265e-05	0.000614126	4.40057e-06	0.0010233	4.17599e-05	2.52254e-05	2.30197e-05	2.65304e-05	0.000631329	1.87395e-05	2.63236e-05	4.48169e-06	3.84327e-06
I2	1.23723e-07	5.19099e-06	7.23666e-06	5.58348e-06	8.35991e-06	3.15776e-06	0.000137961	4.214e-06	5.2153e-06	5.85726e-06	4.87556e-06	7.20619e-06	4.60756e-06	4.95303e-06	6.2369e-06	5.70783e-06	5.98467e-06	3.00275e-06	5.62909e-06	6.12747e-06	4.69022e-06	2.96324e-06	7.27518e-06	5.08527e-06	5.03397e-06	5.77182e-06	2.334e-06	3.33601e-06	3.10089e-06	2.51989e-06	2.18994e-06	4.00129e-06	3.15436e-06	4.79531e-06	3.25242e-06	1.62016e-05	7.66217e-06	2.67669e-05	2.82638e-06	1.87262e-05	3.74821e-06	2.60202e-06	5.36609e-06	8.91239e-06	5.03865e-05	3.97421e-06	3.14916e-06	2.25615e-06	1.23203e-06
I3	9.12479e-07	4.46841e-06	8.09655e-07	6.88487e-06	4.7586e-06	5.69024e-06	9.35309e-07	0.00248909	0.00214025	8.08261e-05	0.000235218	1.31603e-06	7.31608e-05	2.62266e-05	3.49283e-06	1.47873e-05	9.97696e-06	2.58922e-05	1.1034e-05	2.13625e-06	7.34899e-06	0.000564032	3.24136e-05	5.13167e-08	1.07566e-07	5.23781e-07	2.7701e-06	8.74626e-06	2.71784e-06	7.27925e-05	2.34201e-06	1.31516e-05	9.15694e-05	1.70929e-05	2.8125e-07	1.63838e-06	9.00522e-06	0.00017179	1.4103e-06	1.51883e-06	5.71881e-06	4.15768e-05	2.82491e-05	7.33215e-06	1.49494e-05	4.75322e-07	4.34024e-06	5.80144e-07	2.15332e-06
I4	7.90215e-07	6.68172e-06	5.03275e-06	7.09216e-06	5.76204e-06	2.05712e-06	4.72976e-06	1.027e-05	0.000356521	3.79128e-05	1.32569e-05	1.30511e-06	6.20978e-06	1.13158e-05	2.48741e-06	5.80203e-06	7.54e-06	2.11577e-05	4.3733e-06	1.59003e-06	5.85373e-06	1.50545e-05	2.62989e-06	1.57322e-06	4.1938e-06	1.35471e-05	1.05667e-05	2.01009e-05	5.02331e-06	5.46453e-07	2.22944e-06	8.11582e-07	2.31817e-05	1.06857e-05	7.52956e-06	4.32768e-07	5.29062e-06	3.83156e-05	2.31395e-06	4.31162e-06	3.71237e-05	1.97352e-05	0.00010818	8.30419e-05	4.81122e-06	2.95746e-06	9.95092e-06	1.49759e-05	9.83501e-07
I5	1.58728e-06	0.000121649	8.04252e-07	1.03556e-05	7.62664e-06	2.59962e-06	5.17243e-06	9.97032e-06	6.79876e-06	0.0023271	0.000115824	1.69609e-06	7.6383e-06	2.65267e-05	4.60388e-06	5.10116e-05	2.74019e-05	4.25839e-05	1.14073e-05	3.51919e-06	1.17169e-05	0.000193622	3.37456e-06	1.56979e-07	7.95437e-07	7.6996e-07	0.000160775	6.74786e-06	3.4644e-06	1.43199e-06	2.50663e-06	1.88083e-08	1.02585e-06	1.09858e-06	1.77752e-06	2.28005e-06	1.07708e-05	8.27414e-06	2.21686e-06	5.19835e-06	3.64973e-06	1.83665e-05	3.63241e-05	6.91614e-06	1.90426e-06	2.91105e-06	3.36177e-05	5.1044e-06	1.76852e-07
I6	1.41899e-06	9.738e-06	5.07869e-06	3.66653e-05	1.21698e-05	8.51221e-05	0.0004086	3.07325e-05	7.34481e-05	8.4571e-05	0.00232087	3.35242e-06	5.85726e-05	0.000134158	6.25546e-06	4.66581e-05	4.99675e-05	2.01411e-05	9.94023e-05	6.53328e-05	8.22926e-05	0.000132658	1.91182e-05	1.24298e-05	7.80747e-06	2.22276e-05	2.25183e-05	5.45012e-05	4.54317e-05	8.95619e-05	0.000101572	0.00020067	3.15682e-05	1.60857e-05	2.42427e-05	4.09883e-06	3.03945e-05	5.97236e-05	9.11329e-05	2.73184e-05	0.000741749	9.96745e-05	0.000997914	0.000337865	7.59094e-05	0.000282701	0.000271634	0.000284798	0.000245891
I7	0.000283871	0.000116124	0.000555695	0.000886677	0.00102282	2.77192e-05	2.46344e-05	2.06339e-05	3.02818e-05	8.86745e-05	5.90194e-05	0.00124242	0.00107655	0.000664914	0.000808513	0.000122371	8.68994e-05	6.00664e-05	5.94536e-05	3.73998e-05	8.22788e-05	0.000164535	9.2829e-05	0.000690937	0.000257422	3.89439e-05	0.00022206	0.00227762	2.89064e-05	7.43583e-05	0.000622871	0.000119391	3.55083e-05	0.00447996	0.00253219	0.00356416	0.00120228	0.000238921	5.13553e-05	6.66639e-06	0.000986236	0.000350964	8.2249e-05	0.000128036	1.79962e-05	3.25809e-05	0.000465998	7.25671e-05	0.00207089
I8	0.00274206	0.000689942	0.000814777	0.00164039	0.00247012	0.000649611	0.000566589	0.00319858	0.00214308	0.002596	0.00401301	0.000803963	0.0139963	0.0025362	0.000479256	0.00175983	0.00135684	0.00163213	0.00300053	0.00183251	0.0013082	0.00586862	0.0011163	3.81333e-05	0.000149516	0.00220567	0.00141563	0.000788267	4.34576e-05	0.00284716	0.00177282	0.000602334	0.0112257	3.17265e-05	0.000497341	4.2271e-05	0.000115926	0.00104849	6.28385e-05	9.67632e-05	0.000684023	0.00227372	0.000869839	0.000448418	4.60818e-05	0.000216049	0.000203571	2.83113e-05	2.59428e-05
I9	1.34605e-05	0.000180832	3.29325e-05	0.000209027	0.00106829	0.00020313	4.76876e-06	3.748e-05	2.27249e-05	0.000279096	0.000117306	0.000300037	0.000255617	0.00823767	0.000667513	0.000441207	0.000282781	0.000447849	0.001121	0.000463242	0.00109072	0.000679401	0.000125711	3.05366e-05	1.19872e-05	3.69705e-05	0.00807549	0.000117618	4.52889e-06	0.000281539	8.69334e-05	9.74479e-05	4.12809e-05	4.16321e-05	2.00187e-06	1.03966e-06	0.000145071	4.50281e-05	2.6098e-06	1.12607e-05	1.94432e-05	0.000632689	0.000221609	0.000443717	4.94349e-05	2.0277e-05	0.00050906	3.57854e-06	6.55628e-05
I10	7.1779e-07	0.0012935	0.00113261	0.000476074	0.000563052	5.35256e-06	9.41736e-06	1.21998e-05	1.49767e-05	0.000336186	0.00194709	5.50705e-06	0.000217746	0.000708764	0.0104745	0.010246	0.00527627	0.00358789	0.0077069	0.000953502	0.00229137	0.00232454	0.000689427	1.42786e-05	6.00568e-05	4.62763e-05	0.00468461	0.000149553	1.1519e-07	2.20263e-05	7.68202e-05	4.09376e-06	5.94417e-09	2.94208e-07	2.07359e-06	6.1012e-05	0.000641187	8.29572e-07	1.87822e-06	7.49185e-09	7.4969e-08	4.76159e-05	9.37031e-06	4.41183e-08	3.07681e-09	1.41315e-08	6.08319e-05	0	5.04034e-08
I11	6.46546e-06	0.000283123	7.24434e-05	0.000322408	0.000393172	4.42421e-05	1.5417e-05	8.07278e-06	2.81921e-05	0.00049626	0.000102312	7.79486e-06	8.849e-05	0.000381321	8.38488e-05	0.00188031	0.000605899	0.000288147	0.000558148	0.000203775	0.000586763	0.000371728	3.54389e-05	4.30502e-06	9.83925e-06	0.000336029	0.000590491	0.000269249	2.2067e-05	0.000435379	0.000606205	2.8433e-05	4.23481e-06	5.22603e-06	3.75264e-06	3.28169e-05	2.15435e-05	3.53814e-05	3.1675e-06	4.78562e-06	0.000400562	7.45033e-05	8.35826e-06	8.97448e-05	5.73708e-06	2.48129e-06	3.18127e-05	1.91169e-06	0.000557872
I12	4.01913e-05	0.000235321	0.000248847	0.000319575	0.000440485	1.69015e-05	1.87588e-05	3.74669e-05	4.04537e-05	7.4808e-05	5.29254e-05	5.31105e-05	5.49578e-05	0.000177928	0.000128062	0.000242648	0.0013356	0.000339961	0.000259749	5.60384e-05	0.000311249	0.000159596	2.7819e-05	2.30587e-05	1.80788e-05	4.50992e-05	5.98041e-05	0.000228207	4.12932e-06	4.31836e-06	1.22725e-05	6.36315e-06	0.00020806	0.000344142	5.50457e-06	0.000167119	1.67043e-05	6.89409e-06	1.55104e-06	2.41092e-06	4.1284e-06	2.51092e-05	3.33713e-06	4.4437e-06	2.31484e-06	1.57165e-06	3.76767e-05	1.41779e-05	9.81663e-07
I13	3.77595e-06	2.23032e-06	2.59772e-06	1.15273e-05	2.64036e-05	3.12247e-07	7.66203e-07	1.20227e-07	3.31197e-07	2.73141e-07	6.63372e-07	9.03112e-07	4.89557e-07	1.312e-05	9.4044e-07	3.99526e-06	5.49999e-05	0.000952661	8.42146e-07	1.44028e-06	5.07504e-05	2.69191e-06	2.94918e-06	1.82978e-07	5.15921e-07	5.93291e-07	2.69809e-06	1.34084e-05	4.21743e-07	2.33327e-05	3.1396e-05	2.91674e-08	3.64114e-06	0.000243691	0.000275904	0.000186571	0.000196093	1.493e-05	7.32881e-06	7.72533e-07	0.000135647	8.11579e-05	1.00439e-05	6.86706e-07	1.33813e-06	1.63907e-05	0.000286229	3.18918e-06	7.67276e-05
I14	5.10049e-07	1.91017e-05	1.2605e-05	2.33229e-05	3.70046e-05	1.63463e-06	1.96421e-06	1.8812e-06	2.47553e-06	4.08778e-06	7.89605e-06	4.6975e-06	5.7764e-06	8.12267e-06	4.1106e-06	1.51652e-05	0.000191494	0.000114073	0.000578133	0.000167093	0.000223026	5.86031e-05	8.20978e-05	0.000166242	2.56057e-06	3.82129e-06	0.000135358	5.02163e-06	3.9796e-06	0.000229064	8.56709e-05	1.42547e-07	9.668e-06	2.86099e-06	2.0664e-06	1.18383e-05	1.47063e-05	4.09328e-06	3.43961e-05	5.33501e-07	0.000177108	6.55803e-05	1.57967e-05	1.12228e-05	3.32439e-06	0.000207432	5.08927e-06	5.94613e-07	9.38199e-06
I15	7.9237e-08	9.10157e-06	2.86519e-06	3.41652e-06	3.34443e-06	2.61133e-07	3.22364e-07	3.00701e-07	8.48534e-07	1.20811e-06	1.06499e-05	3.07876e-06	2.47088e-06	1.30898e-06	7.49455e-07	2.77734e-06	0.000114044	4.1905e-05	0.000132386	0.00124606	0.000413093	3.81386e-05	5.46977e-07	1.18593e-06	1.8831e-06	1.54538e-06	5.79215e-06	7.70836e-06	2.06743e-06	7.40374e-05	0.000190596	5.06291e-06	2.61717e-06	3.86955e-07	1.58597e-06	1.36369e-07	4.55753e-06	2.57914e-06	1.20232e-05	6.07892e-07	0.000106458	8.11831e-06	3.52868e-06	7.21645e-06	6.67028e-06	0.000232578	1.1308e-05	3.29375e-06	0.000140744
I16	1.07066e-06	2.7563e-06	4.14269e-05	5.7368e-06	1.64208e-05	1.35521e-06	6.89343e-07	1.86754e-06	1.31402e-06	2.98153e-06	2.33548e-06	6.67957e-06	3.32551e-06	8.20728e-06	3.87197e-06	7.55081e-06	2.27512e-05	2.89082e-05	1.8999e-05	1.22335e-05	0.000382393	1.3452e-05	1.15927e-06	8.42978e-05	8.27953e-06	1.90536e-05	2.57127e-06	2.03092e-05	7.32842e-07	8.07092e-05	9.35323e-05	2.87238e-05	2.58624e-06	3.51644e-06	1.0023e-06	1.29364e-06	6.60677e-06	4.78858e-07	2.0499e-07	1.56644e-07	5.19402e-07	1.983e-05	1.38621e-05	3.73848e-06	2.4204e-07	1.14582e-05	9.24601e-07	1.98356e-07	1.5583e-06
I17	2.98294e-06	4.24912e-05	4.21356e-06	3.67482e-06	2.34593e-05	1.61883e-06	5.47867e-07	2.37123e-06	8.89375e-05	2.17949e-06	3.26044e-05	5.40533e-06	2.44101e-06	5.10174e-06	3.49895e-06	1.12444e-05	1.37859e-05	1.06729e-05	8.28706e-06	3.03143e-05	5.40845e-06	0.000650185	2.61614e-07	1.01501e-06	6.05049e-07	3.33829e-07	1.50035e-05	2.42592e-05	2.83302e-05	4.06325e-05	0.000203026	8.74771e-09	5.25691e-06	1.71707e-09	2.25972e-07	7.72485e-08	1.15536e-05	2.83193e-05	5.49617e-07	1.66249e-06	0.000383926	0.000140962	0.000104282	8.90561e-05	2.20639e-06	1.95285e-06	0	1.21563e-05	2.43413e-06
I18	1.15595e-08	9.5925e-07	1.47964e-07	1.98162e-07	1.44393e-06	6.70533e-07	4.28132e-13	9.77905e-08	3.18468e-07	3.07355e-07	0.000104282	1.31928e-07	6.03829e-06	2.03943e-05	0.000187004	5.52026e-05	4.70895e-06	2.10908e-06	1.23243e-07	4.62704e-07	2.39519e-06	5.03403e-07	0.00020124	0	0	0	0	0	0	0	0	0	0	0	0	0	0	0	0	0	0	0	0	0	0	0	0	0	0
E1	0.000843512	0.00335815	0.00383922	0.00832591	0.00565515	0.000721941	0.000401102	0.00164387	0.000637908	0.00169096	0.00161621	0.00137143	0.00355842	0.00483222	0.00360314	0.00384638	0.00140379	0.000759151	0.0010097	0.000738047	0.00128757	0.000982543	0.00088048	0.0277031	0.00185014	0.0133769	0.00110002	0.00103894	0.000410246	0.00120598	0.000280461	0.000476947	0.000557888	0.000279709	0.000568355	4.05721e-05	0.00401071	0.00278146	0.000902015	0.00012316	0.000199797	0.0024174	0.000508137	0.00111738	0.000635886	0.00103849	0.000508057	0.000472138	5.10205e-05
E2	4.85491e-07	9.30778e-07	6.37466e-06	4.50104e-07	1.65837e-06	2.13795e-06	1.22666e-07	6.66868e-07	1.26143e-06	3.38401e-07	3.74398e-06	5.03695e-05	5.87339e-05	9.41551e-06	1.58293e-05	3.70928e-05	3.80862e-05	3.98885e-07	3.0268e-06	4.51798e-06	1.55084e-06	0.000135291	5.92709e-06	7.18095e-05	0.0057989	9.39374e-06	4.24212e-07	7.93129e-05	0.00010284	1.18751e-05	9.60943e-06	5.95118e-05	2.75736e-05	1.04748e-05	0.00112333	3.0133e-05	4.56087e-05	0.000323238	1.09158e-06	0.000129067	1.26624e-05	0.000160255	5.40182e-05	0.000330477	2.60358e-05	1.64061e-06	3.55139e-05	2.23846e-06	1.27157e-06
E3	1.43918e-06	1.81893e-05	7.64409e-06	4.95804e-05	4.26882e-05	2.8654e-05	4.28605e-06	1.70314e-05	1.0427e-05	2.17062e-05	2.30376e-05	4.38572e-06	2.39682e-05	3.41648e-05	1.27002e-05	1.89958e-05	1.72313e-05	7.81398e-06	1.36069e-05	1.22085e-05	1.91728e-05	0.000167892	5.36498e-05	5.65309e-05	1.16327e-05	0.00166812	2.76576e-05	2.48282e-05	2.01405e-05	6.98039e-05	1.10685e-05	3.95821e-05	3.26097e-05	5.80107e-06	9.47399e-06	2.41889e-06	2.18037e-05	0.000227911	7.79851e-06	2.79346e-05	3.457e-06	0.000138662	1.73412e-05	5.1466e-05	2.13602e-05	4.59896e-06	1.63041e-05	1.66251e-05	1.26514e-06
C1	6.15582e-07	1.7448e-05	1.08209e-05	1.36467e-05	2.39536e-05	6.0318e-06	2.21708e-05	5.10357e-06	8.6952e-06	1.13415e-05	1.19423e-05	8.87872e-06	7.89374e-06	1.30616e-05	6.36062e-06	1.45996e-05	1.04807e-05	8.65581e-06	8.26113e-06	1.25161e-05	1.15757e-05	1.64052e-05	1.16241e-05	2.70422e-05	9.72342e-06	4.50602e-05	0.00018216	6.65781e-05	0.00016217	5.8648e-05	2.74149e-05	3.44727e-05	2.07374e-05	1.87532e-05	4.85809e-05	4.80888e-07	0.000127968	6.09732e-05	1.74372e-05	1.73925e-05	1.46007e-05	0.00014326	7.2168e-05	8.01167e-05	3.70236e-05	2.95238e-05	9.86877e-05	5.8092e-05	8.89056e-06
S1	8.38045e-05	8.25829e-05	3.19977e-05	0.000140319	0.000128417	0.000173565	3.64482e-05	8.60429e-05	0.000127473	0.000163629	0.000132046	0.00025065	0.000122842	0.000185163	8.63169e-05	0.000140294	0.000108674	0.000213646	0.000122184	5.5464e-05	7.95453e-05	0.000141424	8.80901e-05	4.612e-05	0.000578619	3.53849e-05	6.70738e-05	0.000905448	2.03729e-05	7.19649e-05	0.000159089	1.7834e-05	3.74836e-05	0.000738538	0.0024075	0.00334928	0.000759035	7.27196e-05	0.00031036	6.93779e-05	0.00017034	0.000126375	0.000301245	3.67816e-05	4.09353e-05	5.17942e-05	0.00020566	9.69803e-06	0.000219918
S2	3.24925e-08	5.71373e-07	4.4423e-07	2.07492e-07	8.40433e-07	5.32372e-07	9.33682e-07	6.37293e-07	1.74106e-06	1.80248e-06	2.17546e-06	3.45173e-07	8.47961e-07	1.46928e-06	3.93073e-07	1.84096e-06	1.76942e-06	6.93192e-07	1.50634e-06	1.75444e-06	4.11577e-06	1.96675e-06	1.26508e-06	1.34763e-07	3.10432e-06	3.17651e-07	1.85945e-07	2.4709e-05	7.70422e-05	1.03942e-05	1.33139e-05	2.04272e-05	1.44916e-05	1.64436e-05	3.07354e-06	6.90028e-07	1.554e-06	5.50293e-05	0.000110132	1.58882e-05	1.95582e-05	9.66798e-06	2.12018e-05	7.90297e-06	6.54916e-05	5.13417e-05	2.82297e-05	0.000151425	5.06281e-05
S3	1.67971e-06	1.29131e-05	3.60832e-05	2.30278e-06	2.7978e-06	3.00243e-06	1.0687e-05	2.62615e-06	2.38274e-06	4.16654e-06	3.06127e-06	2.83625e-06	1.3038e-05	4.36195e-06	1.24217e-05	5.29651e-06	2.12992e-05	2.34201e-05	2.28631e-05	4.40769e-05	3.69137e-05	8.5661e-06	1.20665e-06	4.02962e-06	1.24605e-06	1.93938e-06	4.75314e-06	2.06585e-06	5.89753e-07	6.09221e-05	7.90375e-06	2.21373e-05	1.97667e-06	2.71011e-07	5.48283e-07	3.56318e-06	1.03013e-05	1.14124e-07	9.53071e-06	4.52904e-08	2.05304e-06	2.29247e-06	8.06181e-08	0	2.13309e-05	5.59276e-05	9.61325e-07	2.71568e-06	2.22247e-07
S4	4.30085e-05	4.2831e-05	4.80952e-05	7.76724e-05	0.000122069	1.48058e-05	1.19616e-05	5.69114e-06	1.92916e-05	2.56323e-05	2.80329e-05	2.28512e-06	5.06903e-05	2.91554e-05	2.35618e-05	3.55405e-05	6.81897e-05	8.96881e-05	3.71889e-05	6.05304e-05	5.93309e-05	1.8183e-05	5.75035e-06	2.67767e-05	4.6192e-06	1.31324e-05	0.000278165	3.01142e-06	7.50074e-07	0.000417342	0.00112404	2.07282e-05	2.76168e-06	3.26539e-06	6.97938e-06	1.85278e-05	2.08879e-05	6.74745e-07	1.4309e-05	0	6.50373e-07	2.27885e-05	3.96446e-07	3.30688e-08	3.23063e-08	1.62041e-05	1.33354e-05	9.41233e-06	3.89559e-06
S5	4.76022e-07	2.69851e-06	4.98398e-07	1.79713e-06	1.03251e-06	5.03034e-07	1.86974e-06	3.41472e-07	7.4498e-07	7.83626e-07	8.73518e-07	3.1528e-07	7.24042e-07	1.04445e-06	2.90374e-07	1.25256e-06	1.23409e-06	8.17938e-07	6.90704e-07	5.91704e-07	2.0016e-06	1.66586e-06	4.83442e-07	3.85482e-07	9.16408e-07	3.04443e-06	1.68168e-06	1.39584e-06	1.28842e-06	1.53193e-05	3.77358e-06	5.06814e-05	9.02764e-06	2.41087e-06	1.80974e-06	7.93673e-07	8.05827e-06	1.9285e-06	2.24792e-06	1.03791e-06	1.60666e-06	1.04107e-05	7.49008e-06	7.51727e-06	9.177e-07	2.723e-06	3.0068e-06	1.88625e-05	8.28213e-07
S6	5.83091e-07	1.23123e-06	7.42422e-07	1.09211e-06	1.37424e-06	2.52887e-07	6.3133e-07	3.10086e-07	5.97002e-07	5.72436e-07	6.0603e-07	1.69954e-06	3.6369e-07	8.98839e-07	6.20506e-07	1.20136e-06	1.37183e-06	8.59957e-07	8.4048e-07	4.09577e-07	1.00859e-06	1.18738e-06	1.73702e-07	9.61849e-07	9.43359e-07	5.47595e-07	7.15414e-07	1.80389e-06	4.69249e-07	8.64384e-07	4.89091e-07	1.46181e-06	1.36126e-05	2.68466e-07	1.03191e-06	1.47731e-06	8.12656e-07	5.65553e-07	9.81741e-07	3.62765e-07	2.12875e-07	7.84806e-07	1.10202e-06	7.75121e-06	3.48098e-07	4.19353e-07	2.94398e-07	1.06333e-06	9.42703e-07
T1	1.0421e-05	3.23892e-05	1.89671e-05	5.54582e-05	2.69487e-05	2.96538e-05	5.37164e-05	3.44871e-05	6.54438e-05	4.86986e-05	7.13199e-05	1.00601e-05	7.37375e-05	5.90456e-05	1.96302e-05	8.50429e-05	0.000135063	9.60203e-05	8.88004e-05	0.000204218	0.000256629	6.6495e-05	2.94547e-05	2.57714e-05	3.12283e-05	6.44729e-05	8.20514e-05	0.00108558	0.0001382	0.000561701	0.000436748	0.000718199	9.70736e-05	0.00684995	3.80413e-05	1.91234e-05	1.61908e-05	7.49931e-05	0.000153907	2.63116e-05	0.000721592	0.000201474	0.000878037	0.00142663	5.94735e-05	0.000197346	0.0016417	0.000220363	0.000490194
T2	0.000228151	0.00039848	0.000145148	0.000586611	0.000978038	0.000757718	0.000382994	0.000453196	0.000536079	0.000853127	0.000723783	0.000205611	0.000666776	0.00101635	0.000454838	0.000715932	0.000680559	0.000622446	0.000615202	0.000302795	0.00054513	0.000742951	0.000483633	0.000263825	0.000155871	0.000332914	0.000980365	0.00206309	5.4825e-05	0.000560765	0.000433225	0.000200552	0.000374751	0.000258857	0.00236127	0.000140765	0.000194603	0.000470154	0.000441913	0.000466329	0.000897008	0.000780545	0.00073728	0.000284513	0.000433096	0.000165964	0.000988366	0.000213363	0.000433896
T3	4.228e-05	8.32657e-05	2.49038e-05	0.000267562	0.000112924	0.000105135	9.58856e-06	6.92499e-05	6.5123e-05	5.65189e-05	6.387e-05	6.50022e-05	7.94361e-05	0.000114064	9.28263e-05	9.74109e-05	0.000104996	0.00011209	7.81801e-05	5.68791e-05	5.97533e-05	7.84321e-05	4.29137e-05	7.23781e-05	0.000117454	8.48962e-06	4.47245e-05	0.000510965	7.48774e-06	4.58422e-05	5.87289e-05	1.02972e-05	2.10603e-05	3.17391e-05	3.81841e-05	0.00236451	2.02483e-05	2.16397e-05	0.000172642	6.06135e-05	0.000126699	0.000150597	5.29447e-05	1.97669e-05	1.31827e-05	1.12262e-05	5.82354e-05	4.58965e-06	0.000102548
T4	4.40784e-05	0.000182541	3.4705e-05	0.000215209	0.000105382	0.000123235	1.0202e-05	3.89209e-05	3.85833e-05	5.89971e-05	4.71826e-05	5.07664e-05	8.46301e-05	9.72492e-05	0.000112001	6.13724e-05	5.59357e-05	3.19065e-05	4.35003e-05	2.49144e-05	6.64193e-05	7.01432e-05	2.8554e-05	6.5015e-05	3.1261e-05	1.24486e-05	3.48248e-05	0.000758444	9.33697e-06	0.000115925	7.30224e-05	7.41486e-05	2.36842e-05	3.12256e-05	1.04931e-05	1.08969e-05	0.000226713	1.83346e-05	0.00010919	6.03694e-05	0.000123411	9.99852e-05	0.000161808	5.5e-05	1.95813e-05	1.71157e-05	0.000195985	3.52049e-05	9.23257e-05
T5	2.12963e-06	1.47701e-05	8.75815e-06	2.62272e-05	2.02672e-05	1.46553e-05	1.57357e-05	7.27463e-06	9.77028e-06	1.27637e-05	1.05986e-05	3.98383e-06	1.54378e-05	1.56557e-05	5.25118e-06	1.62314e-05	2.56269e-05	1.04178e-05	1.90442e-05	1.25162e-05	3.77391e-05	1.7737e-05	1.06761e-05	1.12164e-05	1.30548e-05	1.70003e-05	1.83325e-05	3.08101e-05	2.71692e-05	0.000164332	0.000122282	8.67734e-05	2.84535e-05	6.29526e-05	1.55876e-05	7.15872e-06	1.08573e-05	7.09106e-06	2.76773e-05	6.87388e-06	0.000165302	6.07369e-05	0.000231525	0.000180925	1.19615e-05	3.41841e-05	0.000114283	0.000209344	4.94399e-05
T6	4.27154e-05	4.01189e-05	2.54557e-05	4.44725e-05	5.84076e-05	0.000139704	0.00013661	0.000107938	0.000209228	7.20966e-05	9.73056e-05	3.41496e-05	8.32307e-05	6.3739e-05	2.45623e-05	6.9417e-05	8.74658e-05	0.00013156	9.31523e-05	0.000119588	9.37786e-05	0.000129167	2.3457e-05	3.30196e-05	2.19362e-05	4.25465e-05	5.69028e-05	6.21164e-05	1.19842e-05	8.61428e-05	8.66359e-05	3.07196e-05	0.000107761	8.3114e-05	5.25558e-05	5.79921e-05	4.30637e-05	0.00020741	8.15218e-05	0.000166964	0.00013035	6.82136e-05	0.00012851	6.98851e-05	0.000195322	7.73389e-05	0.000192547	3.44628e-05	8.13773e-05
T7	1.14365e-06	4.10101e-06	1.20214e-06	7.16873e-06	5.69101e-06	3.80321e-06	6.13327e-06	2.27013e-06	3.03285e-06	4.55578e-06	4.54898e-06	8.69483e-07	5.49505e-06	6.45973e-06	1.80199e-06	6.51945e-06	7.27214e-06	3.59019e-06	5.47482e-06	3.19714e-06	1.12039e-05	5.61091e-06	2.82419e-06	1.40995e-06	3.46173e-06	7.04512e-06	5.4154e-06	9.94235e-06	4.19318e-06	3.58353e-05	2.96245e-05	1.91666e-05	5.8599e-06	1.82881e-05	2.7434e-05	2.52336e-06	2.07383e-06	2.02084e-06	5.24993e-06	2.01379e-06	4.39888e-05	1.3995e-05	2.98437e-05	2.02122e-05	6.28427e-06	6.32446e-06	7.71263e-06	3.03601e-05	6.30039e-06
T8	2.91454e-06	0.000230586	6.70028e-05	0.000231935	0.000190031	0.000144807	0.000122991	4.14578e-05	0.000111763	9.26709e-05	0.000186053	6.37024e-05	0.000174248	0.000121095	5.44916e-05	0.000121846	0.000163973	0.000152209	0.000163083	0.000140863	0.000128843	7.60421e-05	4.69559e-05	3.77221e-05	5.17543e-05	3.04242e-05	4.01586e-05	0.00022696	0.000454475	0.000350915	0.000208462	6.20312e-05	1.23177e-05	4.89662e-05	6.42971e-05	0.000243913	1.23107e-05	0.000247192	0.000997226	7.47361e-05	0.000663861	0.000186004	0.00018623	0.00014564	0.000151031	0.000484952	0.000390868	0.00100447	0.000212689
T9	1.97525e-05	5.84549e-06	8.72447e-06	1.93006e-05	3.45351e-05	4.94094e-06	1.12801e-05	2.22642e-05	2.85191e-06	3.43092e-06	2.3751e-05	6.47329e-06	2.03843e-05	7.60533e-06	1.03889e-05	3.96886e-06	6.44199e-06	4.9688e-06	4.67875e-06	2.89093e-06	3.43788e-06	1.57186e-05	3.29056e-06	4.61828e-05	1.34499e-05	0.000953613	1.81373e-06	5.76932e-06	3.93969e-06	5.50782e-06	3.28113e-06	6.62215e-06	6.24766e-06	1.08635e-05	1.77656e-06	7.8624e-06	3.22016e-05	3.80014e-06	7.32323e-06	3.74838e-06	5.2951e-05	0.000227999	2.1849e-05	7.99253e-05	5.00959e-07	7.11927e-06	4.72594e-06	1.5186e-05	2.11767e-06
T10	1.2316e-07	2.10283e-06	1.55003e-06	4.33652e-06	1.82404e-06	1.5447e-06	8.0729e-07	1.70232e-06	2.39062e-06	2.26843e-06	1.955e-06	5.92914e-07	2.1598e-06	3.0757e-06	1.44355e-06	2.18395e-06	3.2446e-06	1.22599e-06	2.54566e-06	2.13118e-06	1.56792e-06	3.25753e-06	1.27892e-06	5.09842e-06	3.29531e-06	9.8477e-06	1.95236e-06	3.18896e-06	3.18127e-06	7.65174e-06	3.29816e-06	1.20322e-05	4.71373e-06	4.94156e-06	3.99792e-06	1.6212e-06	6.74801e-06	8.85553e-06	1.12357e-06	1.48425e-06	2.76295e-06	6.26029e-06	0.000143819	2.25475e-05	2.02093e-05	8.7948e-06	1.27847e-05	4.3222e-06	5.31418e-07
T11	0	0	0	0	0	0	0	0	0	0	0	0	0	0	0	0	0	0	0	0	0	0	0	0	0	0	0	0	0	0	0	0	0	0	0	0	0	0	0	0	0	0	0	0.000774589	0	0	0	0	0
T12	8.16097e-09	1.01336e-06	2.63766e-07	1.61326e-06	1.10976e-06	5.3002e-07	1.63271e-06	4.65807e-07	6.38973e-07	8.7986e-07	9.8012e-07	2.16883e-07	8.06173e-07	1.27959e-06	4.09524e-07	1.4278e-06	1.41434e-06	6.37101e-07	1.0164e-06	6.15655e-07	2.27328e-06	1.3311e-06	6.76587e-07	1.92275e-07	9.04111e-07	1.91452e-06	1.29274e-06	3.38044e-06	2.28288e-06	2.50171e-06	2.78055e-06	8.40084e-07	1.20639e-06	5.47383e-07	6.08864e-07	7.4612e-07	4.95727e-07	9.75137e-07	1.33967e-06	3.53288e-06	2.0085e-06	3.75075e-06	7.04946e-06	3.34914e-06	5.53735e-06	1.9383e-06	7.8156e-06	2.22601e-05	3.22612e-06
T13	3.28554e-06	3.50519e-06	2.99592e-06	1.08658e-05	8.72813e-06	3.24577e-06	2.78839e-06	3.49413e-06	6.53306e-06	5.86589e-06	5.70976e-06	1.03438e-06	4.20527e-06	7.01961e-06	2.26531e-06	7.32512e-06	8.77658e-06	2.69325e-06	5.40183e-06	1.88794e-05	1.08217e-05	5.20051e-06	3.7199e-06	1.02305e-05	4.74651e-06	2.89065e-05	3.74962e-05	2.08363e-05	1.39933e-05	1.497e-05	1.54928e-05	4.70044e-05	4.35901e-05	3.12912e-05	6.50749e-06	0.000116486	7.69057e-05	5.40614e-05	1.03667e-05	3.31237e-06	1.76533e-05	3.29905e-05	5.79624e-05	1.14322e-05	4.95259e-06	0.000413299	0.000113523	8.92193e-05	8.47428e-06
T14	3.88154e-06	6.50629e-06	1.35846e-06	3.51232e-06	2.1474e-06	2.96331e-06	1.49004e-06	8.44992e-07	2.13416e-06	2.33943e-06	3.40062e-06	1.05289e-06	2.62093e-06	1.93448e-06	5.27614e-07	2.7233e-06	4.35667e-06	2.33678e-06	2.80034e-06	1.74291e-06	3.35575e-06	1.62359e-06	1.28535e-06	4.11578e-07	2.88859e-07	1.55717e-06	9.87725e-07	7.19317e-06	4.08458e-06	1.50901e-05	1.28168e-05	2.12329e-05	4.63121e-06	2.8102e-06	2.20147e-06	9.87203e-07	1.39873e-07	2.21895e-05	6.13027e-06	3.41009e-06	1.01097e-05	1.30918e-05	2.51451e-05	7.46879e-06	3.07079e-06	1.24698e-05	0.000370348	6.81026e-05	9.1978e-06
T15	2.67891e-05	0.000102143	3.44993e-05	6.69568e-05	6.93022e-05	2.51507e-05	8.5406e-06	2.3568e-05	2.22177e-05	3.58193e-05	4.11982e-05	2.5899e-05	4.13914e-05	5.33555e-05	6.37571e-05	4.404e-05	4.33374e-05	3.16209e-05	3.77158e-05	5.61809e-05	5.23656e-05	5.64765e-05	2.82168e-05	0.000103921	9.76237e-05	0.000154715	6.03161e-05	0.000142166	0.000228153	9.0623e-06	0.000101252	7.78484e-05	3.19868e-05	0.000118175	0.000196761	0.000219134	0.000243731	8.17315e-05	8.52005e-05	1.6431e-05	0.00013707	0.000142443	3.42949e-05	5.8775e-05	7.89093e-05	8.63701e-05	2.56828e-05	0.000134043	0.000341938
T16	2.13506e-06	2.53824e-05	1.47104e-05	1.06462e-05	2.7544e-05	6.53369e-06	1.98577e-06	3.34945e-06	2.0375e-05	1.17803e-05	2.01888e-05	2.13086e-06	5.24194e-06	1.37028e-05	4.01023e-06	1.35923e-05	1.27721e-05	8.5476e-06	7.07743e-06	8.86976e-06	1.63783e-05	6.43003e-06	2.27699e-05	9.78524e-06	7.4917e-06	1.31542e-05	7.61958e-05	7.93037e-05	1.38867e-05	7.6216e-05	2.86406e-05	5.89236e-06	6.37328e-06	0.000267274	1.13771e-05	0.000107882	4.60864e-05	1.70621e-05	6.35967e-05	1.78549e-05	1.55704e-05	3.37332e-05	0.000111753	1.96944e-05	6.28017e-05	8.29309e-05	4.17289e-05	0.000112143	0.000396603
T17	6.20424e-06	4.39415e-05	1.87609e-05	1.31121e-05	4.14908e-05	1.5083e-05	1.53108e-05	6.98794e-06	1.16884e-05	1.4952e-05	2.20929e-05	1.06729e-05	1.81777e-05	2.49904e-05	1.36805e-05	3.13155e-05	3.0715e-05	3.92693e-05	2.72171e-05	1.85482e-05	2.50101e-05	2.00048e-05	1.11824e-05	1.39257e-05	1.73341e-05	5.06776e-05	3.2269e-05	0.000336493	1.41634e-05	0.000106541	7.50332e-05	8.23253e-05	5.60376e-05	2.69369e-05	0.000103826	2.7063e-05	9.16574e-05	2.95704e-05	5.12795e-05	3.00086e-05	4.94769e-05	0.00031944	0.00011589	0.000179293	2.0854e-05	2.28192e-05	2.48027e-05	4.29133e-05	0.00012229
T18	1.62252e-06	8.43435e-07	1.42486e-06	3.27753e-06	1.72462e-06	1.19141e-06	3.36195e-06	7.4264e-07	1.03972e-06	1.97071e-06	1.4617e-06	2.6135e-07	1.69451e-06	1.75749e-06	1.59566e-06	2.19765e-06	2.512e-06	7.09932e-06	2.42083e-06	4.89855e-06	5.30611e-06	1.97369e-06	6.15602e-07	5.72937e-07	1.08435e-06	1.61467e-06	1.59294e-06	3.3971e-06	7.24708e-06	2.54721e-06	4.86713e-06	6.85237e-06	3.17826e-06	2.72239e-06	1.23683e-06	4.21269e-07	4.1722e-06	1.23643e-06	1.81034e-06	7.14016e-07	4.75314e-05	8.08992e-06	7.8276e-06	1.94632e-06	8.66561e-07	1.00974e-05	7.3267e-06	5.54847e-06	2.11848e-06
[truncated: 2 more columns]

## Sheet: 2023
Inter-sectoral Embodied Carbon Flow Matrix
	F1	M1	M2	M3	M4	I1	I2	I3	I4	I5	I6	I7	I8	I9	I10	I11	I12	I13	I14	I15	I16	I17	I18	E1	E2	E3	C1	S1	S2	S3	S4	S5	S6	T1	T2	T3	T4	T5	T6	T7	T8	T9	T10	T11	T12	T13	T14	T15	T16
F1	0.000876036	6.03132e-06	1.67899e-07	1.41678e-06	1.31511e-06	0.00250727	0.000457933	0.00121712	9.99597e-05	0.000677955	0.000287161	1.64089e-07	0.000226443	2.09722e-06	2.13746e-07	1.29283e-06	5.65999e-07	2.7455e-07	5.40435e-07	1.77584e-08	0	0.000400219	0	7.65751e-07	7.99941e-08	0	5.44515e-05	6.75075e-07	1.83344e-06	0.000100715	1.2104e-05	7.15546e-06	5.5824e-06	5.46892e-08	3.72036e-07	0	2.31474e-06	1.8608e-05	6.69841e-08	0.000823972	5.07946e-05	0.000550283	9.86002e-06	2.66116e-05	2.17592e-05	4.24413e-06	1.02313e-07	6.37035e-07	0
M1	3.87766e-05	0.0108221	5.2611e-05	0.000470602	0.000856807	0.000168367	8.21267e-06	0.000279263	8.35573e-05	7.99169e-05	0.000673472	0.0040038	0.00107419	0.00349254	0.00159896	7.20403e-05	4.89893e-05	6.22426e-06	2.01422e-05	2.53143e-08	3.38335e-05	7.3261e-05	2.96814e-05	0.00975602	0.00186984	0	2.01167e-05	4.64287e-06	4.31705e-06	7.24133e-05	2.16341e-05	8.8767e-05	6.60661e-05	1.07357e-05	0	0	1.34144e-05	3.33447e-05	2.06533e-06	3.88473e-06	5.02647e-09	3.90425e-05	2.01668e-05	1.21627e-05	1.63508e-05	0	1.93233e-05	1.93594e-06	0
M2	0	2.21198e-06	6.5174e-05	3.03974e-06	3.40644e-06	0	0	0	0	0	1.79603e-06	0.00440367	0.000110485	1.8396e-05	1.10114e-05	1.3114e-05	1.0757e-05	6.048e-06	1.0484e-06	0	0	0	0	9.63732e-05	0.00390102	0	0	4.84322e-09	0	1.18764e-07	0	0	1.00183e-06	0	5.71029e-09	0	0	0	0	0	0	0	0	1.91274e-07	2.57136e-07	0	0	0	0
M3	0	0	0	0.00403265	0	0	0	0	0	0	0	1.73202e-05	0.00012592	9.08479e-05	0.00609334	0.000329549	0	0	0	1.52725e-11	0	0	5.16672e-06	0	0	0	0	0	0	4.20395e-05	0	0	0	0	0	0	0	0	0	0	0	0	0	0	0	0	0	0	0
M4	6.26547e-08	0.000152129	0.00451092	0.000103654	0.000628651	1.95936e-05	3.51928e-08	1.06563e-06	5.44464e-07	1.57927e-06	1.86298e-05	1.75787e-06	0.000207356	0.00230798	1.32501e-05	9.11155e-06	6.25429e-06	5.98071e-06	2.62362e-05	2.41328e-06	4.92117e-06	0.000206434	1.18181e-06	1.31094e-05	0	0	0.000268073	1.84497e-06	1.01009e-08	2.63971e-06	2.06368e-07	1.77377e-07	5.05295e-08	0	3.57916e-08	0	1.83714e-05	1.72665e-06	1.12674e-06	3.70654e-08	4.86445e-08	2.38729e-06	1.52161e-06	0	2.89762e-07	2.18849e-09	0	3.6089e-08	0
I1	0.000287049	4.9126e-06	2.67287e-06	1.02358e-05	6.93495e-06	0.000726091	1.38325e-05	3.50296e-06	0.000114437	9.12773e-06	8.4886e-06	2.96089e-06	7.26367e-05	6.63508e-06	2.03482e-06	7.18858e-06	5.54659e-06	3.0358e-06	4.70724e-06	2.83183e-06	3.70342e-06	1.80578e-05	1.83441e-06	7.28056e-06	1.78542e-06	1.31036e-05	3.56884e-06	9.76084e-06	9.13028e-06	6.30596e-05	1.54561e-05	7.0035e-05	4.3777e-05	0.000160306	6.01651e-06	1.60249e-05	2.29649e-05	0.000407071	4.44177e-06	0.00114323	5.40019e-05	3.63646e-05	3.54815e-05	2.60665e-05	0.000458834	1.59368e-05	2.44195e-05	8.13213e-06	6.14845e-06
I2	1.56422e-07	2.65499e-07	6.93951e-08	2.88009e-06	2.95228e-06	5.09243e-07	0.000116049	1.13771e-06	7.6142e-08	1.7248e-06	1.34308e-06	3.35449e-06	3.00139e-07	4.46609e-07	5.20069e-06	2.78268e-06	4.92317e-06	1.7519e-06	3.53144e-06	3.99991e-06	3.84252e-06	1.66266e-06	1.20554e-06	3.94562e-06	3.99178e-06	5.79378e-06	9.00739e-07	9.75406e-07	1.31432e-06	8.90767e-07	9.72658e-07	3.73556e-06	1.09575e-06	1.87862e-06	1.63737e-06	1.09564e-07	3.34879e-08	9.42682e-06	1.53034e-07	9.39997e-06	2.54686e-06	1.98295e-06	4.62033e-06	3.15708e-06	1.74596e-05	1.29871e-06	1.11903e-06	8.25787e-07	9.96568e-07
I3	2.2454e-07	2.70856e-06	1.14247e-06	2.55157e-06	1.64644e-05	2.53473e-06	1.08831e-05	0.0022967	0.00215625	8.12157e-05	0.000100663	8.03078e-07	2.58963e-05	2.30623e-06	9.87228e-07	1.21175e-05	7.69369e-06	7.09736e-06	7.14243e-06	2.59374e-06	1.29128e-05	0.000560604	7.86546e-06	6.36899e-08	1.99247e-07	1.44042e-06	2.07592e-07	2.07297e-06	2.31279e-08	4.22543e-05	1.86347e-06	1.30381e-05	8.36431e-05	2.2728e-05	6.75059e-07	1.32255e-06	2.48815e-05	0.000119017	1.87156e-06	1.63972e-06	7.18276e-06	2.258e-05	5.21714e-06	8.78444e-06	1.15432e-05	8.79643e-07	4.72641e-05	8.5652e-08	4.20751e-06
I4	4.66655e-07	1.82225e-05	5.03803e-06	6.61092e-06	9.98167e-06	8.6352e-06	8.84087e-06	1.53456e-05	0.000393505	5.03042e-05	1.57877e-05	4.03898e-06	7.54092e-06	1.62329e-05	2.26515e-06	5.80856e-06	1.12372e-05	1.83079e-05	7.86582e-06	4.03752e-06	1.23092e-05	2.88795e-05	5.72109e-06	3.02835e-06	1.09335e-05	2.97716e-05	3.78267e-06	4.0276e-06	5.34861e-06	1.30198e-05	5.92188e-06	3.09885e-06	2.08805e-05	1.51451e-05	1.5216e-05	1.07381e-05	1.56119e-05	4.44905e-05	6.19247e-06	4.01397e-06	4.47551e-05	1.71021e-05	0.000123178	4.06775e-05	1.28648e-05	3.04711e-06	6.07164e-06	1.77577e-05	7.0204e-06
I5	1.53745e-06	8.83066e-05	9.48141e-06	1.55503e-05	4.72319e-06	4.00151e-06	8.95821e-06	6.08467e-06	6.73594e-06	0.00186236	0.000107113	1.64458e-06	7.57676e-06	1.62375e-05	1.1657e-06	5.42711e-05	9.54284e-06	4.4724e-05	8.32876e-06	3.89126e-06	1.01778e-05	0.000133021	4.39321e-07	1.43877e-06	2.08115e-07	3.78307e-07	0.000121979	1.87908e-06	2.72907e-06	1.14898e-06	3.86783e-06	3.74839e-06	1.06464e-06	7.06229e-07	2.50468e-06	8.24151e-06	4.4129e-06	9.02198e-06	1.81728e-06	1.26031e-06	3.24486e-06	1.39793e-05	1.53584e-05	2.70675e-06	2.93629e-06	5.28811e-06	1.77022e-05	3.79429e-06	2.30785e-06
I6	8.03639e-06	8.21435e-07	8.27154e-07	1.42354e-05	2.71532e-05	0.000102504	0.000369748	3.14109e-05	5.524e-05	9.2163e-05	0.00268303	5.44654e-06	6.02196e-05	0.000130334	3.59179e-06	3.32159e-05	3.61239e-05	1.66945e-05	6.9015e-05	3.8656e-05	3.41784e-05	0.000137688	1.04643e-06	5.40157e-06	6.69054e-07	2.1269e-06	1.31363e-05	3.81448e-06	3.70204e-05	0.000103927	8.56189e-05	0.000208781	9.21016e-06	1.05362e-05	3.24163e-06	6.82365e-07	6.96405e-06	5.64661e-05	5.12425e-05	3.10958e-05	0.000756791	4.62328e-05	0.000805073	0.000278336	7.09306e-05	0.000248978	0.000289377	0.000231118	0.000190824
I7	0.000100291	7.32793e-05	0.000103399	0.00109653	0.00115811	2.54436e-05	4.38479e-06	3.1906e-05	3.801e-05	9.08513e-05	4.86153e-05	0.00137894	0.000929924	0.000641656	0.000824142	0.000141725	6.42235e-05	3.72503e-05	3.27645e-05	1.56507e-05	8.99032e-05	0.000126676	5.05139e-05	0.000335197	0.000413764	1.88457e-05	0.000271698	0.00179524	3.39243e-05	0.00010469	0.000381688	7.85753e-05	8.79925e-06	0.00313918	0.000640772	0.00367743	0.000155169	0.000116645	5.19863e-05	2.37825e-05	0.000395164	0.000237073	8.01326e-05	0.000157251	2.16628e-05	2.44301e-05	0.000346424	5.90579e-05	0.00115885
I8	0.00234937	0.000509733	0.000748758	0.0015107	0.00258836	0.000532261	0.000466524	0.00320599	0.00212613	0.00237758	0.00381863	0.00086958	0.0116039	0.00180733	0.00041626	0.00110437	0.00102005	0.00127787	0.00232147	0.000931157	0.000881139	0.00350729	0.000226428	1.18866e-05	2.36373e-05	0.00274108	0.00130808	0.000199725	2.17485e-05	0.00223381	0.00144258	0.000503919	0.00955641	0.00014233	0.000791717	1.66803e-05	8.25694e-05	0.000963792	6.57603e-05	0.000122711	0.000264102	0.00188934	0.000696075	0.000299185	4.25911e-05	7.59592e-05	0.000409697	2.24967e-05	0.000232818
I9	1.68726e-05	9.3011e-05	1.80909e-05	0.000155932	0.000725428	0.000198247	2.98002e-05	3.78786e-05	1.80534e-05	0.000275894	8.23478e-05	0.000280748	0.000202332	0.00735172	0.000542313	0.000550141	0.000319336	0.000473082	0.00106943	0.000566204	0.000934698	0.000272258	1.00842e-05	9.52009e-05	2.62152e-06	1.62147e-05	0.00694739	1.15354e-05	1.15151e-06	0.000396361	1.42285e-05	8.78189e-05	2.74664e-05	0	4.4048e-06	1.19398e-07	1.65834e-05	4.46763e-05	5.57129e-06	3.13623e-05	1.07857e-05	0.000442588	9.08852e-07	4.66053e-08	1.38499e-06	5.01197e-06	2.58777e-06	1.36331e-06	8.4216e-07
I10	6.8236e-06	0.000761141	0.00036969	0.000321755	0.00054307	1.33814e-05	3.16545e-08	2.20352e-05	1.74927e-05	0.000354735	0.000805034	1.00896e-05	0.000289252	0.000868248	0.00869364	0.0094955	0.00367365	0.00258665	0.0065371	0.000909469	0.00173682	0.00544327	0.000103155	1.33704e-05	3.51619e-05	4.95637e-05	0.00326141	1.7009e-05	5.20765e-08	4.3075e-05	2.34615e-05	4.29496e-06	5.53182e-08	1.24025e-05	5.85092e-07	7.83669e-06	1.447e-05	2.3204e-06	7.21147e-07	2.20744e-08	6.57168e-08	2.66793e-05	2.49065e-07	2.14752e-07	7.4344e-08	2.68689e-07	1.12787e-06	5.69608e-10	3.40505e-07
I11	8.96828e-06	0.000340139	7.04146e-06	0.000288594	0.000341163	4.57788e-05	2.58335e-05	3.25897e-05	4.36175e-05	0.000294473	0.000103834	7.53704e-06	7.81063e-05	0.000325405	2.6057e-05	0.0017653	0.000566421	0.00029839	0.000473198	0.000161851	0.000487695	0.000220453	5.49815e-06	4.62324e-06	4.5503e-06	0.000305784	0.00061931	2.67536e-05	1.46715e-05	0.000271752	0.000303437	1.99287e-05	1.17823e-06	1.20689e-06	4.03351e-06	1.99588e-05	5.65243e-06	2.97183e-05	2.87259e-06	6.55996e-06	0.000328935	9.88854e-05	7.57818e-06	5.59876e-05	5.47271e-06	7.38714e-06	1.40487e-05	1.73219e-06	0.000455088
I12	4.60911e-05	0.000180698	0.000181744	0.000241254	0.000363271	1.28305e-05	9.05708e-06	3.6318e-05	2.0445e-05	4.84747e-05	6.10303e-05	3.37208e-05	4.34275e-05	0.000140571	8.99171e-05	0.000180716	0.00124814	0.000276951	0.000222759	0.0001293	0.000250464	6.04592e-05	1.4695e-05	2.15747e-05	8.70822e-06	3.78028e-05	6.04948e-05	5.00978e-05	1.50195e-06	6.30079e-06	7.21288e-06	8.92002e-06	0.000205991	7.39137e-05	1.69053e-05	8.322e-06	8.41441e-06	1.21126e-05	1.34011e-06	5.34243e-06	8.48909e-07	2.06783e-05	2.09165e-06	2.77782e-06	1.87103e-06	3.79083e-06	2.13604e-05	1.57916e-05	5.06588e-05
I13	7.15179e-06	4.10761e-06	6.52629e-07	1.8017e-05	2.67245e-05	7.54199e-07	4.64195e-08	9.65803e-07	1.44028e-06	1.93894e-06	7.02675e-07	2.27617e-07	1.29043e-06	8.77483e-06	6.94171e-07	3.59628e-06	6.79268e-05	0.000832199	6.58336e-06	9.56708e-07	6.43537e-05	4.14301e-06	1.91868e-06	2.13751e-07	3.4803e-07	7.69569e-07	2.20091e-06	0.000204963	7.79543e-08	5.23355e-06	1.72489e-05	7.27382e-07	1.79452e-06	0.000131097	0.000315751	5.34407e-05	0.00011373	7.4853e-07	3.41948e-07	3.53072e-06	0.000102986	5.21473e-05	2.26821e-06	3.70723e-06	3.82957e-07	7.73165e-07	0.0001143	1.2007e-06	8.89841e-05
I14	6.18903e-07	1.41915e-05	4.21338e-06	1.89016e-05	3.11587e-05	2.02e-06	1.97307e-06	2.53833e-06	1.6418e-06	3.469e-06	1.58573e-05	1.04075e-06	4.75168e-06	7.52922e-06	2.65833e-06	8.5167e-06	0.00018384	0.000120836	0.000555104	0.000166027	0.000203446	2.20036e-05	2.5624e-06	0.000201895	2.60585e-06	5.75872e-06	0.000113127	1.01626e-05	1.93796e-07	0.000100791	6.5719e-05	6.95122e-07	3.92495e-06	4.55036e-07	1.89317e-05	2.7629e-06	2.94524e-05	8.17767e-06	2.66484e-05	2.64382e-06	5.53981e-05	3.82717e-05	2.2219e-06	1.24666e-06	2.11499e-06	4.38969e-05	9.54205e-06	4.68128e-07	1.37442e-05
I15	6.56715e-07	3.06728e-06	4.57412e-07	4.48536e-07	1.66887e-06	1.53685e-06	4.94385e-07	6.59336e-07	7.33631e-07	9.34461e-07	1.5617e-05	4.45344e-07	3.20525e-06	2.12977e-06	1.49801e-06	3.71808e-06	0.000122848	4.67401e-05	0.000158145	0.00124604	0.000386431	2.27006e-05	7.82359e-07	4.52965e-06	1.11124e-06	2.23449e-06	7.42417e-06	1.13853e-05	1.08795e-06	7.76781e-05	0.000125459	4.50074e-06	5.60471e-06	3.11123e-06	6.55972e-06	9.67536e-07	1.8697e-05	1.37698e-05	1.21259e-05	5.18831e-06	6.11732e-05	2.48785e-05	1.69285e-05	9.74017e-06	6.15388e-06	0.000144062	4.48428e-06	4.44648e-06	3.1407e-05
I16	4.80029e-07	2.91533e-06	4.05423e-05	8.21397e-06	1.54562e-05	1.67002e-06	7.45956e-07	7.01793e-07	2.52315e-06	1.11761e-06	2.65534e-06	7.25161e-06	3.4355e-06	1.11923e-05	2.9307e-06	2.47851e-06	3.5288e-05	2.93757e-05	2.80449e-05	2.27923e-05	0.000506454	1.05522e-05	3.98891e-06	0.00010562	1.03484e-05	1.34774e-05	5.48519e-06	4.45116e-06	3.64638e-07	0.000148521	0.000157418	3.58824e-05	2.95151e-06	3.52664e-05	1.66667e-06	3.31855e-06	1.88492e-06	1.0238e-06	1.82885e-07	5.33878e-08	2.10893e-06	1.91419e-05	1.21658e-05	4.47362e-06	7.05197e-07	6.1632e-06	1.50865e-06	1.89688e-07	3.12014e-05
I17	3.66236e-07	8.82311e-06	5.6477e-06	5.75611e-06	9.19859e-06	3.14118e-06	2.88156e-06	3.4805e-06	2.05408e-05	3.7191e-06	7.6178e-06	2.78449e-06	6.50721e-06	3.60136e-06	3.76871e-06	1.12593e-05	5.71766e-06	6.02428e-06	6.62451e-06	5.55957e-06	8.9977e-06	0.00018195	1.57715e-06	6.04343e-06	2.74018e-06	3.54718e-06	6.6149e-06	1.6677e-06	1.32522e-05	4.81206e-05	6.78155e-05	8.53169e-06	2.7839e-06	2.64614e-06	3.23062e-06	5.58465e-07	5.25746e-06	1.70556e-05	2.1423e-06	4.58418e-06	7.66104e-05	4.74707e-05	4.01184e-05	4.56963e-05	4.27149e-05	3.92644e-06	0	7.75855e-06	2.76295e-05
I18	0	0	0	0	0	0	0	1.09493e-07	1.57373e-07	5.83566e-07	7.34082e-05	2.01724e-07	4.67509e-06	5.18547e-06	0.000109865	2.97156e-05	0	0	0	0	0	1.91792e-06	0.000242827	0	0	0	0	0	0	0	0	0	0	0	0	0	0	0	0	0	0	0	0	0	0	0	0	0	0
E1	0.000655375	0.00267377	0.0017697	0.00596915	0.00444246	0.000599699	0.000215935	0.00126618	0.000567862	0.00126475	0.00135699	0.00107229	0.00262094	0.0036585	0.00363765	0.0031448	0.00110591	0.00058339	0.000820709	0.000664666	0.00110096	0.00110749	0.000370764	0.0208809	0.0016422	0.00942021	0.000921377	0.000584811	0.000316188	0.000975978	0.000333362	0.000443881	0.00048896	1.7125e-05	0.00180429	4.36834e-05	0.00517595	0.00243253	0.000664677	0.00031043	0.000272019	0.00213545	0.000559419	0.000994156	0.000804803	0.000788689	0.000668609	0.000377685	0.000451748
E2	6.55734e-06	6.01815e-06	1.13562e-05	2.19985e-06	4.34592e-05	2.07167e-05	8.3637e-06	1.12406e-05	1.27052e-05	4.54845e-06	5.51284e-05	6.52804e-05	7.30792e-05	1.55704e-05	1.25759e-05	4.10773e-05	5.50667e-05	1.10248e-05	1.54445e-05	5.37234e-06	4.07327e-05	8.9652e-05	4.73196e-05	0.000128554	0.00585525	5.56777e-07	7.13247e-07	3.87837e-05	8.75913e-05	3.59958e-05	1.76655e-05	4.99855e-05	2.98478e-05	7.51644e-07	0.00609554	1.05817e-05	0	0.000306857	4.22528e-06	0.000265051	1.73027e-05	5.41855e-05	7.99905e-05	0.000112845	7.43537e-05	3.63405e-06	1.1704e-05	1.70986e-06	7.09874e-05
E3	9.28481e-07	7.22444e-06	2.15244e-05	9.73608e-06	2.32352e-05	3.91121e-05	3.6796e-06	8.91598e-06	1.21711e-05	1.27353e-05	2.44059e-05	8.79206e-06	1.64853e-05	2.33695e-05	1.05458e-05	8.95142e-06	1.31794e-05	8.09425e-06	1.43694e-05	1.0151e-05	1.92616e-05	2.31387e-05	3.62892e-05	4.50122e-05	9.83728e-06	0.00155482	2.76644e-05	9.24836e-06	1.48396e-05	6.10611e-05	6.34455e-06	2.48747e-05	1.85951e-05	3.20827e-06	2.05956e-05	2.18729e-06	1.64041e-05	0.000257731	1.23588e-05	4.43841e-05	1.84524e-06	6.15066e-05	2.99445e-05	6.25569e-05	7.00887e-05	8.62486e-06	9.11462e-06	1.37051e-05	2.19871e-05
C1	5.78508e-06	4.655e-06	2.46241e-06	1.95397e-06	2.50399e-06	1.58358e-06	2.00778e-06	2.22127e-06	2.1146e-06	3.75762e-06	2.02807e-06	6.20444e-07	2.50852e-06	1.97338e-06	1.17582e-06	1.72187e-06	2.34255e-06	1.42427e-06	1.68856e-06	3.76456e-06	2.73754e-06	3.13792e-06	3.8148e-06	2.98027e-05	2.05898e-06	1.19143e-05	0.000271188	1.16263e-05	7.56812e-05	1.3731e-05	7.00613e-06	4.78492e-05	1.85773e-05	1.15071e-06	1.0503e-05	7.55744e-08	3.14588e-06	5.70135e-05	8.5335e-06	8.6008e-06	3.29259e-06	8.43862e-05	5.93411e-05	4.24982e-05	3.08823e-05	8.68431e-06	2.17811e-05	2.83136e-05	4.39634e-06
S1	9.09081e-05	0.000109704	3.1449e-05	0.000107997	0.000144082	0.000152908	9.0035e-05	0.000184783	0.000213458	0.000156925	0.000143674	0.000145862	0.000173281	0.000189606	0.000134891	0.000142036	0.00014157	0.000138714	0.000138384	6.61506e-05	9.89727e-05	0.000135263	2.60558e-05	7.39054e-05	0.000111755	4.61381e-05	0.000149784	0.000552945	4.52048e-06	0.000125241	6.27725e-05	3.45778e-05	8.85212e-05	0.000828674	0.000335596	0.00177178	0.000475017	5.72247e-05	0.000212989	0.000126515	6.73998e-05	8.67742e-05	6.40274e-05	2.48498e-05	5.68398e-05	1.60032e-05	0.000774697	9.47049e-06	0.000136962
S2	3.10403e-08	1.3057e-06	6.5646e-07	1.88293e-08	9.41183e-07	7.93277e-07	6.76327e-08	4.70973e-07	8.81652e-07	1.62547e-06	1.11491e-06	3.52439e-08	7.53545e-07	8.77333e-07	6.65465e-08	1.04144e-06	1.02706e-06	6.86303e-07	1.08655e-06	9.03612e-07	4.44385e-06	6.40817e-07	3.05809e-07	3.45755e-07	1.1985e-06	2.24147e-06	3.34049e-07	1.18901e-05	8.10438e-05	3.17977e-05	3.12059e-05	6.28162e-05	2.88466e-05	4.52754e-06	1.10051e-05	1.74922e-06	2.32706e-06	0.000241595	0.000145389	3.95477e-05	0.000118277	2.55886e-05	3.78205e-05	5.99228e-05	0.000144522	0.000121913	9.86941e-05	0.000191933	0.000101544
S3	0	0	0	0	0	0	0	0	0	0	0	0	0	0	0	0	0	0	0	0	0	0	0	0	0	0	0	0	0	2.12515e-05	0	0	0	0	0	0	0	0	0	0	0	0	0	0	0	0	0	0	0
S4	4.87338e-05	6.42289e-05	3.33414e-05	7.69835e-05	9.4756e-05	1.05661e-05	8.97135e-06	6.10667e-06	1.98814e-05	2.41748e-05	2.34544e-05	2.34808e-06	4.05941e-05	2.58368e-05	1.92702e-05	3.14213e-05	5.35404e-05	7.17314e-05	3.08544e-05	5.15088e-05	4.80183e-05	1.20977e-05	3.56465e-06	3.51221e-05	6.34478e-07	6.05375e-06	0.000489935	1.67481e-05	5.55081e-06	0.00038733	0.000913342	1.82035e-05	4.24437e-06	2.0365e-06	1.33168e-05	5.91518e-06	2.33777e-05	1.49753e-05	4.9624e-05	3.57947e-08	6.01382e-07	2.41945e-05	1.81466e-06	2.12625e-06	9.291e-08	2.13526e-05	2.06471e-05	8.01117e-06	3.35386e-06
S5	4.91269e-07	1.26619e-06	3.89967e-07	5.04282e-07	6.82877e-07	4.53507e-07	4.81073e-07	4.07177e-07	5.48553e-07	8.03394e-07	4.29732e-07	2.0827e-07	5.97181e-07	6.49788e-07	1.82922e-07	7.65355e-07	7.15153e-07	4.21367e-07	3.93357e-07	2.87994e-07	1.07887e-06	3.89949e-07	4.0407e-07	9.32418e-08	6.55258e-07	1.7553e-06	7.45044e-07	1.26942e-06	8.65861e-07	2.03918e-06	3.00589e-06	4.28932e-05	7.29265e-06	2.16131e-06	1.03474e-05	1.10351e-06	1.15078e-05	3.34819e-06	3.62862e-06	2.45771e-06	1.99143e-06	2.2072e-06	7.33501e-06	2.75631e-06	2.46386e-06	2.39355e-06	1.64336e-06	1.48759e-05	1.1464e-06
S6	3.30984e-07	2.12976e-06	1.0064e-06	1.95578e-06	2.32525e-06	3.99061e-07	2.84629e-07	5.53761e-07	9.02414e-07	8.30906e-07	9.02708e-07	3.47713e-06	5.19338e-07	1.30094e-06	1.13498e-06	1.69781e-06	2.05911e-06	1.0883e-06	1.19709e-06	9.78983e-07	1.19689e-06	2.40804e-06	9.32727e-07	1.47408e-06	1.34868e-06	1.58562e-06	1.10417e-06	7.98043e-07	3.06479e-08	3.64583e-07	5.53746e-07	1.18587e-06	1.51783e-05	2.64503e-07	2.13078e-06	8.2791e-07	2.81635e-06	4.47843e-07	8.40243e-07	5.5021e-08	1.26761e-07	1.56804e-06	1.85509e-06	2.98357e-06	2.14792e-07	3.26008e-07	1.95648e-07	1.30466e-06	4.76989e-07
T1	6.6695e-05	5.23704e-06	2.14104e-05	2.208e-05	5.9364e-05	3.18654e-05	2.88922e-05	3.50598e-05	0.000100379	6.23272e-05	4.83208e-05	3.84114e-06	7.93396e-05	4.88168e-05	7.74539e-06	6.84352e-05	9.37417e-05	6.53904e-05	6.31813e-05	4.97105e-05	0.000115435	5.30178e-05	7.80442e-06	5.38453e-05	1.61696e-05	2.60533e-05	7.45501e-05	3.16552e-05	8.78855e-05	0.000886581	0.000643161	0.000895435	5.05819e-05	9.34338e-05	2.1829e-05	2.57616e-05	1.21118e-05	5.56642e-05	0.000118434	6.70788e-05	0.00158713	0.000124843	0.000665932	0.000960207	0.000137599	0.000252489	8.79547e-06	0.000216382	8.59671e-05
T2	0.000191261	3.48995e-05	7.27126e-06	4.99636e-05	0.000218363	9.43216e-05	3.10266e-05	8.7147e-05	0.000292114	0.000149704	9.40179e-05	5.23554e-06	0.000173047	0.000134003	1.56797e-05	0.000114262	0.000151834	4.41859e-05	0.000109891	7.94138e-05	0.000327958	0.000109825	2.98749e-05	0.000220879	1.3659e-05	5.47909e-05	0.000108879	4.9729e-05	0.000246646	0.000928892	0.0014867	0.000406324	0.00173828	0.000370034	0.000676213	2.97926e-05	6.87529e-05	0.00217676	0.000528413	0.00217467	0.00429895	0.00315187	0.00274382	0.00128854	0.00195417	0.000343883	6.95451e-05	0.000897271	0.00118634
T3	9.45332e-05	2.54828e-05	1.10404e-06	1.55606e-05	4.73387e-05	4.52932e-05	8.02134e-06	4.71407e-05	6.44826e-05	4.67936e-05	2.13461e-05	4.23819e-06	0.000121297	6.59319e-05	6.3296e-06	0.000121151	0.000100612	1.0499e-05	6.75371e-05	9.57996e-06	0.000152018	7.68623e-05	2.70771e-05	5.00748e-06	8.05644e-08	1.4907e-05	8.45765e-05	3.3287e-06	9.68639e-07	0.000178951	0.000244729	0.000316461	1.55374e-05	9.96883e-06	2.96682e-06	7.06777e-06	6.69565e-07	1.54748e-05	7.77815e-06	1.11229e-06	1.53833e-05	0.000214738	0.000154649	0.000381807	1.27789e-05	4.13311e-05	3.32483e-05	6.82945e-05	2.34844e-05
T4	8.48444e-05	1.37447e-05	8.16948e-06	1.33086e-05	5.86353e-05	4.10794e-05	1.23369e-05	3.64897e-05	6.22354e-05	5.89973e-05	3.84514e-05	2.55743e-06	7.59485e-05	4.58577e-05	9.1204e-06	5.03374e-05	8.85257e-05	2.24628e-05	4.85257e-05	2.26901e-05	0.000120881	3.86848e-05	1.15383e-05	8.17495e-06	6.22813e-06	1.18984e-05	4.30554e-05	2.37992e-05	2.87046e-05	0.000155784	0.000524535	0.000357769	3.21806e-05	6.72348e-05	2.13131e-05	1.0884e-05	1.66545e-05	6.82932e-05	0.000134192	4.12003e-05	0.000149673	8.65087e-05	0.000114365	0.00038497	5.98661e-05	0.000106135	1.31717e-05	4.16092e-05	0.000107233
T5	1.19564e-05	1.03844e-05	3.02447e-05	2.73348e-05	3.61138e-05	2.42725e-05	1.98676e-05	1.89335e-05	2.1107e-05	1.18594e-05	2.66895e-05	1.51664e-05	2.31371e-05	1.87751e-05	3.39461e-05	1.58154e-05	2.69239e-05	1.8037e-05	1.4135e-05	7.64066e-06	2.29762e-05	2.44692e-05	6.34878e-06	2.22494e-05	2.57461e-06	6.00571e-06	1.30298e-05	1.84857e-05	2.0398e-05	0.000213015	0.000154603	0.000125933	2.36107e-05	8.57668e-05	1.59234e-05	5.85132e-06	7.57948e-06	7.91367e-06	3.12119e-05	1.17587e-05	0.000323329	4.00905e-05	0.000312991	0.000296364	1.64841e-05	3.91919e-05	0.000109917	0.000204785	2.37397e-05
T6	6.2675e-05	6.70015e-05	1.72439e-05	6.09134e-05	7.65525e-05	0.000161905	0.000133315	0.000114426	0.000212619	0.000235174	0.000173494	5.85247e-05	0.000125672	0.000123225	6.58075e-05	0.000104945	0.000129345	0.000195897	0.000148368	0.000125682	0.000126971	0.000130804	8.80768e-06	5.62292e-05	6.11344e-05	3.84235e-05	0.000127332	6.84929e-05	7.70775e-06	7.60064e-05	6.36123e-05	3.03686e-05	0.000174885	0.000101031	0.000110918	6.66061e-05	3.14931e-05	0.000112908	1.85292e-05	0.000170556	0.000100278	6.78991e-05	8.56157e-05	3.3167e-05	9.61149e-05	4.18132e-05	5.98268e-05	1.87237e-05	6.62117e-05
T7	4.52445e-06	9.23193e-06	2.30485e-06	1.50446e-05	1.3643e-05	1.17994e-05	1.32526e-05	5.87709e-06	7.89823e-06	1.17609e-05	1.26714e-05	2.05031e-06	1.45745e-05	1.72102e-05	4.20482e-06	1.60194e-05	1.85906e-05	8.33098e-06	1.3794e-05	8.63666e-06	2.59984e-05	8.54587e-06	3.55366e-06	4.7956e-06	8.56244e-06	1.66113e-05	2.08144e-05	5.14711e-05	9.26745e-06	9.7794e-05	8.41113e-05	4.5611e-05	1.38839e-05	7.63083e-05	6.84345e-05	6.37194e-06	5.1719e-06	6.55318e-06	1.09439e-05	5.99225e-06	0.00013087	2.8028e-05	8.75823e-05	6.93608e-05	1.83891e-05	1.22693e-05	1.94087e-05	7.05828e-05	1.58174e-05
T8	1.57762e-05	0.000196788	8.7042e-05	0.000128899	0.00012813	0.000159065	7.29174e-05	4.29577e-05	0.000149635	6.66762e-05	0.000108593	5.00083e-05	0.000140301	0.000100696	3.64205e-05	8.23894e-05	0.000128838	0.000132925	0.000102761	9.95223e-05	9.05313e-05	0.000154353	1.55994e-05	3.32006e-05	0.000102622	5.32297e-05	2.97595e-05	7.08397e-05	0.000348699	0.000201132	0.000279234	5.8968e-05	3.07686e-05	0.000231048	9.99501e-05	0.000243491	5.12353e-06	0.000341062	0.000595952	7.15659e-05	0.000688501	0.000166808	0.000243866	0.000209676	0.000184237	0.000419269	0.000306926	0.000584015	0.000205362
T9	2.12643e-05	5.08335e-06	5.9289e-06	1.73989e-05	3.12526e-05	4.9449e-06	7.81955e-06	1.9954e-05	3.93359e-06	5.22348e-06	2.47979e-05	5.04149e-06	6.82396e-06	7.37654e-06	8.62233e-06	4.94452e-06	6.08599e-06	4.26575e-06	4.61954e-06	3.32867e-06	7.316e-06	7.40037e-06	3.65523e-06	4.21676e-05	2.08458e-06	0.000832583	3.29343e-06	2.0482e-05	4.33906e-06	3.16369e-05	1.2498e-05	1.23765e-05	1.1602e-05	1.64692e-05	9.4473e-06	0.000109378	2.75825e-05	1.68817e-05	1.75758e-05	6.70902e-06	4.75412e-05	0.000401583	1.76352e-05	8.32781e-05	9.75132e-06	1.14981e-05	4.10175e-06	2.98654e-05	1.93829e-05
T10	3.03878e-07	2.60238e-06	3.95771e-06	2.62461e-06	2.3317e-06	1.98855e-06	8.5456e-07	3.22791e-06	3.80397e-06	3.28412e-06	2.49655e-06	1.37043e-06	3.38525e-06	4.58151e-06	3.07769e-06	2.60762e-06	4.55006e-06	1.67857e-06	3.62401e-06	3.52216e-06	1.69608e-06	3.51258e-06	1.53095e-06	3.13132e-06	3.96067e-06	1.23594e-05	9.95684e-07	1.10304e-06	2.5398e-06	1.7015e-05	5.56118e-06	2.17726e-05	2.34382e-06	1.30721e-05	4.35321e-06	2.93265e-05	7.38631e-06	1.52626e-05	1.98441e-06	2.35793e-06	3.83908e-06	6.3188e-06	0.000212643	1.00623e-05	2.37951e-05	8.92278e-06	4.15075e-06	5.11091e-06	4.60013e-07
T11	0	0	0	0	0	0	0	0	0	0	0	0	0	0	0	0	0	0	0	0	0	0	0	0	0	0	0	0	0	0	0	0	0	0	0	0	0	0	0	0	0	0	0	0.000687098	0	0	0	0	0
T12	2.71725e-08	1.84105e-06	1.38216e-06	2.53841e-06	1.08937e-06	1.27773e-06	2.17978e-06	1.06322e-06	8.07331e-07	9.6935e-07	6.14991e-07	5.10788e-07	1.06625e-06	9.45501e-07	2.81049e-07	8.48262e-07	1.16914e-06	3.54465e-06	6.51862e-07	4.23827e-07	1.47358e-06	5.28278e-07	1.37136e-07	1.6433e-06	2.27395e-07	4.00273e-07	1.88505e-06	2.74936e-06	1.94676e-06	1.86596e-06	3.09421e-06	1.63576e-06	7.42169e-07	1.36596e-06	1.28414e-06	5.56759e-06	9.27401e-07	2.41281e-06	2.03956e-06	1.65427e-06	9.67677e-06	4.5859e-06	1.00213e-05	2.47644e-05	0.000110219	3.86112e-06	1.85343e-06	4.29475e-05	1.06928e-05
T13	4.95591e-06	3.56279e-06	3.69895e-06	1.16614e-05	1.05604e-05	7.61598e-06	3.60805e-06	6.40295e-06	1.14688e-05	6.59016e-06	1.03647e-05	1.2124e-06	9.62396e-06	7.01503e-06	3.25325e-06	8.31961e-06	1.36398e-05	7.08709e-06	1.22174e-05	6.26951e-05	1.59354e-05	6.36557e-06	2.93016e-06	1.58562e-05	1.00013e-05	2.10543e-05	4.35406e-05	4.74352e-05	1.97858e-05	3.07021e-05	4.5567e-05	5.06412e-05	5.40138e-05	0.000132947	2.3097e-05	0.000117431	0.000111471	6.41049e-05	2.0539e-05	7.14257e-06	3.36983e-05	4.67496e-05	7.01095e-05	2.61538e-05	5.19109e-06	0.000561886	0.000132638	0.000111444	2.08024e-05
T14	1.52411e-05	1.34578e-05	2.80113e-06	4.87563e-06	7.13708e-06	2.13475e-05	3.34392e-06	9.27992e-06	1.53541e-05	2.06938e-05	1.2147e-05	6.18109e-06	1.91165e-05	1.68101e-05	1.42079e-05	1.68947e-05	1.6263e-05	1.90614e-05	2.99397e-05	7.86042e-06	1.88987e-05	2.22394e-05	1.89556e-06	1.3004e-05	4.99085e-06	5.75939e-06	1.19142e-05	4.78029e-06	2.54169e-06	1.25456e-05	1.38558e-05	1.39834e-05	2.812e-05	5.08709e-06	7.74925e-06	2.18421e-06	2.48484e-06	2.33128e-05	0.00012129	1.14743e-05	1.23366e-05	8.07718e-06	1.68255e-05	1.56497e-05	1.35707e-05	2.84347e-05	0.000403267	4.99638e-05	1.43602e-05
T15	3.04417e-05	0.000103555	6.18645e-05	6.31353e-05	6.89469e-05	1.45987e-05	5.99321e-06	2.57604e-05	1.33998e-05	2.0827e-05	3.58916e-05	2.11016e-05	3.38709e-05	4.91626e-05	6.70675e-05	4.33673e-05	3.87116e-05	1.88682e-05	3.0396e-05	3.75388e-05	3.64812e-05	3.69652e-05	8.40576e-06	0.000102546	7.64264e-05	0.000144173	8.9275e-05	0.000293974	0.000257819	2.01924e-05	8.1271e-05	6.16637e-05	2.14129e-05	8.67416e-05	0.000119645	8.8268e-05	0.000340492	6.2712e-05	9.51442e-05	1.35107e-05	0.000146356	0.000106356	3.08276e-05	8.67316e-05	9.00155e-05	4.77955e-05	2.8976e-05	0.000193752	0.000297791
T16	1.2393e-06	1.90382e-05	4.37164e-05	1.24793e-05	4.46735e-05	1.32532e-05	5.64837e-06	6.28377e-06	2.24156e-05	1.02152e-05	1.6114e-05	5.62502e-06	8.46674e-06	2.12188e-05	4.78602e-06	1.31508e-05	1.80473e-05	1.06153e-05	1.93826e-05	1.21397e-05	1.70078e-05	3.0906e-05	2.59694e-05	1.3015e-05	4.58982e-05	5.89561e-05	0.000196412	7.60769e-05	4.63798e-06	5.58153e-05	2.46607e-05	1.15492e-05	1.25869e-05	0.00052385	0.000172155	6.2144e-05	0.000146842	2.34821e-05	7.82728e-05	1.37857e-05	1.66194e-05	6.57073e-05	0.000135526	0.000136218	5.92309e-05	5.10621e-05	5.68038e-05	2.39255e-05	0.000415169
T17	7.86675e-06	5.49223e-05	1.41608e-05	9.21113e-06	2.66681e-05	1.46241e-05	8.21795e-06	1.19599e-05	1.26094e-05	2.18643e-05	2.65554e-05	1.05575e-05	2.15271e-05	2.47461e-05	1.05037e-05	2.9267e-05	2.79371e-05	3.53702e-05	2.47474e-05	1.72509e-05	2.52158e-05	1.57732e-05	9.89953e-06	2.67342e-05	2.13747e-05	7.57781e-05	4.4395e-05	9.51823e-05	1.31779e-05	0.000104024	7.78143e-05	8.63086e-05	5.83345e-05	4.7179e-05	0.000260157	1.24881e-06	0.000135211	8.11087e-05	5.15895e-05	3.87576e-05	5.73072e-05	0.000332187	0.000125734	0.000164381	2.61721e-05	1.94207e-05	1.45812e-05	4.24969e-05	0.000165394
T18	1.35535e-06	4.49023e-07	6.19992e-08	7.35866e-07	8.78312e-07	6.80059e-07	3.65569e-07	1.15647e-06	7.88592e-07	5.91128e-07	9.05346e-07	1.64428e-07	1.15505e-06	2.03272e-06	3.33186e-07	1.32694e-06	1.19703e-06	4.25933e-07	3.91191e-07	2.92214e-07	6.22238e-07	7.30947e-07	3.54978e-07	6.39943e-07	1.7069e-07	5.99116e-07	4.71493e-07	1.03668e-06	4.51858e-06	2.7e-06	3.08955e-06	6.61549e-06	1.10539e-06	7.2975e-07	7.56743e-07	3.92203e-06	7.26101e-08	1.57651e-06	6.03927e-07	1.07848e-06	4.73855e-06	2.32157e-06	3.29304e-06	4.09771e-06	1.23135e-06	1.65781e-06	1.90531e-06	2.94885e-06	4.26016e-06
[truncated: 2 more columns]
